# Supplementary material for: Immunologically active ferumoxytol-poly(I : C) nanomaterials inhibit metastatic melanoma by regulating myeloid-derived suppressor cell differentiation
Source: Royal Society of Chemistry journal article supplement (doi:10.1039/d3bm00416c), 2023-01-01
Supplement: d3bm00416c1.pdf [file d3bm00416c1.pdf]

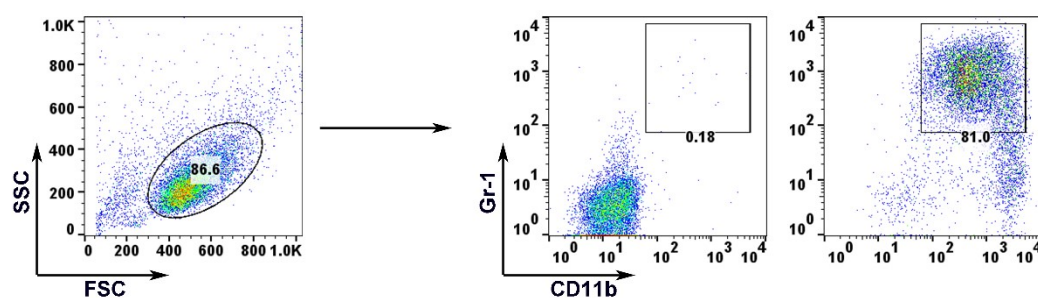

**Supplementary Fig. 1** Analysis and identification of bone marrow-derived MDSCs by flow cytometry.

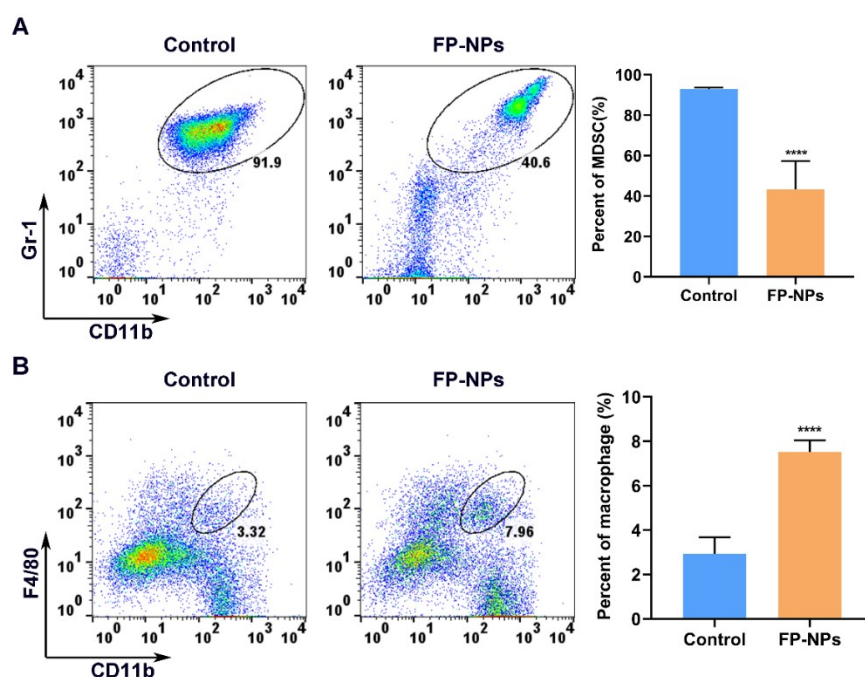

**Supplementary Fig. 2** (A) The altered population of MDSCs in the blood of 4T1 mice treated with PBS and FP-NPs. (B) The altered population of macrophages in the lung of 4T1 mice treated with PBS and FP-NPs. All results are represented as mean  $\pm$  S.D. \*\*\*\*  $P < 0.0001$ .
