# Supplementary material for: Immunologically active ferumoxytol-poly(I : C) nanomaterials inhibit metastatic melanoma by regulating myeloid-derived suppressor cell differentiation
Source: Royal Society of Chemistry journal article supplement (doi:10.1039/d3bm00416c), 2023-01-01
Supplement: d3bm00416c2.xlsx [file d3bm00416c2.xlsx]

## Sheet: Con-vs-FP-NPs.filter.annot
id	Control1-48h_fpkm	Control2-48h_fpkm	Control3-48h_fpkm	FP-NPs1-48h_fpkm	FP-NPs2-48h_fpkm	FP-NPs3-48h_fpkm	Control_mean	FP-NPs_mean	log2(fc)	PValue	FDR	Symbol
ENSMUSG00000033880	92.78	83.41	86.76	232.79	249.6	239.15	87.65	240.513	1.45629	8.82e-137	1.42e-132	Lgals3bp
ENSMUSG00000025498	17.72	12.77	14.39	80.38	83.49	74.14	14.96	79.3367	2.40688	3.84e-123	3.08e-119	Irf7
ENSMUSG00000031762	85.12	80.92	87.71	553.11	436.03	377.97	84.5833	455.703	2.42965	1.56e-105	8.34e-102	Mt2
ENSMUSG00000031765	239.58	232.74	238.59	722.89	631.54	600.22	236.97	651.55	1.45917	6e-92	2.22e-88	Mt1
ENSMUSG00000079017	102.62	81.59	92.59	319.55	322.42	293.32	92.2667	311.763	1.75657	6.92e-92	2.22e-88	Ifi27l2a
ENSMUSG00000090231	16.36	13.11	15.6	50.22	55.79	48.39	15.0233	51.4667	1.77643	2.04e-89	5.45e-86	Cfb
ENSMUSG00000060802	1298.54	1204.51	1321.81	3273.6	3043.5	2808.68	1274.95	3041.93	1.25454	3.75e-85	8.59e-82	B2m
ENSMUSG00000050578	41.33	36.09	42.08	155.21	117.03	141.85	39.8333	138.03	1.79293	1.13e-77	2.27e-74	Mmp13
ENSMUSG00000028238	38.48	40.06	38.57	82.81	78.82	79.5	39.0367	80.3767	1.04195	1.76e-76	3.14e-73	Atp6v0d2
ENSMUSG00000029304	2368.78	2728.57	2412	5463.65	5829.87	6122.72	2503.12	5805.41	1.21367	9.93e-75	1.59e-71	Spp1
ENSMUSG00000029561	28.3	19.16	21.6	81.8	97.06	91.72	23.02	90.1933	1.97013	4.37e-69	6.38e-66	Oasl2
ENSMUSG00000062960	1.16	0.97	0.98	10.02	6.83	6.39	1.03667	7.74667	2.90162	6.55e-67	8.77e-64	Kdr
ENSMUSG00000038642	967.61	906.15	966.08	1656.7	1772.41	1728.35	946.613	1719.15	0.860851	7.43e-64	9.18e-61	Ctss
ENSMUSG00000030107	8.95	7.04	7.74	28.48	31.84	28.18	7.91	29.5	1.89897	2.39e-63	2.74e-60	Usp18
ENSMUSG00000021614	84.27	85.14	86.16	43.35	43.87	48.24	85.19	45.1533	-0.915852	3.89e-60	4.17e-57	Vcan
ENSMUSG00000003882	17.21	19.31	18.59	47.6	40.44	43.88	18.37	43.9733	1.25928	5.37e-59	5.39e-56	Il7r
ENSMUSG00000040950	250.87	260.19	253.89	98.17	113.83	117.95	254.983	109.983	-1.21312	2.58e-56	2.44e-53	Mgl2
ENSMUSG00000022587	888.84	831.42	847.57	1501.35	1445.68	1406.84	855.943	1451.29	0.761749	3e-56	2.68e-53	Ly6e
ENSMUSG00000005413	143.56	145.36	151.53	336.04	279.9	302.66	146.817	306.2	1.06046	2.95e-53	2.49e-50	Hmox1
ENSMUSG00000066861	11.68	10.53	12.05	32.47	42.7	42.43	11.42	39.2	1.77929	1.66e-51	1.34e-48	Oas1g
ENSMUSG00000037849	3.45	1.83	2.23	11.85	15.75	13.79	2.50333	13.7967	2.4624	2.79e-50	2.13e-47	Ifi206
ENSMUSG00000022584	885.77	785.51	873.41	1595.47	1605.54	1489.11	848.23	1563.37	0.882135	9.67e-49	7.06e-46	Ly6c2
ENSMUSG00000022504	8.23	8.3	7.68	2.81	2.15	2.25	8.07	2.40333	-1.74753	6.27e-48	4.24e-45	Ciita
ENSMUSG00000004668	15.51	16.03	17.38	8.04	8.04	8.18	16.3067	8.08667	-1.01184	6.33e-48	4.24e-45	Abca13
ENSMUSG00000021242	122.61	115.07	122.26	193.68	197.01	193.16	119.98	194.617	0.697841	4.2e-47	2.7e-44	Npc2
ENSMUSG00000079293	323.01	356.96	345.75	575.82	693.31	651.6	341.907	640.243	0.905018	4e-46	2.47e-43	Clec7a
ENSMUSG00000030256	1.73	1.43	1.69	8.23	5.62	5.77	1.61667	6.54	2.01627	7.76e-46	4.62e-43	Bhlhe41
ENSMUSG00000035692	14.85	8.92	12.52	49.52	55.12	52.55	12.0967	52.3967	2.11487	1.92e-45	1.1e-42	Isg15
ENSMUSG00000027533	134.99	116.35	127.17	243.08	266.3	240.96	126.17	250.113	0.987213	2.06e-45	1.14e-42	Fabp5
ENSMUSG00000030605	38.96	39.55	39.31	120.43	95.46	87.47	39.2733	101.12	1.36445	9.96e-45	5.33e-42	Mfge8
ENSMUSG00000040963	54.05	50.98	54.09	10.05	13.08	15.6	53.04	12.91	-2.03859	5.28e-44	2.74e-41	Asgr2
ENSMUSG00000073411	330.23	317.94	319.74	596.64	558.23	515.77	322.637	556.88	0.787456	1.13e-43	5.65e-41	H2-D1
ENSMUSG00000046718	57.18	37.8	44.27	149.13	137.77	136.88	46.4167	141.26	1.60564	7.77e-43	3.78e-40	Bst2
ENSMUSG00000049723	3341.32	3525.12	3439.54	5537.07	5524.28	6106.35	3435.33	5722.57	0.736215	1.07e-42	5.07e-40	Mmp12
ENSMUSG00000032661	21.4	15.59	18.45	45.42	50.61	49.09	18.48	48.3733	1.38825	1.21e-42	5.53e-40	Oas3
ENSMUSG00000037921	3.85	3.17	3.02	9.81	8.91	8.94	3.34667	9.22	1.46204	4.3e-42	1.92e-39	Ddx60
ENSMUSG00000028037	1.34	0.76	0.92	6.02	6.47	5.63	1.00667	6.04	2.58496	4.85e-41	2.05e-38	Ifi44
ENSMUSG00000027514	33.08	30.45	35.38	65.7	69.86	72.45	32.97	69.3367	1.07246	3e-40	1.23e-37	Zbp1
ENSMUSG00000033355	18.87	12.93	17.33	49.93	73.22	68.94	16.3767	64.03	1.96711	7.81e-40	3.13e-37	Rtp4
ENSMUSG00000063450	15.01	12.28	11.74	7.16	6.98	7.6	13.01	7.24667	-0.844232	9.68e-40	3.79e-37	Syne2
ENSMUSG00000040296	26.8	23.95	25.61	45.01	51.39	47.55	25.4533	47.9833	0.914679	9.88e-39	3.78e-36	Ddx58
ENSMUSG00000022797	37.51	36.07	36.79	19.55	21.19	18.97	36.79	19.9033	-0.886304	1.33e-38	4.98e-36	Tfrc
ENSMUSG00000028583	27.54	29.56	31.21	58.9	50.99	55.65	29.4367	55.18	0.906531	1.89e-38	6.9e-36	Pdpn
ENSMUSG00000040713	103.55	82.59	95.15	230.28	166.03	155.21	93.7633	183.84	0.971355	4.39e-38	1.57e-35	Creg1
ENSMUSG00000067212	73.21	62.72	69.59	141.72	124.65	130.1	68.5067	132.157	0.947933	3.31e-37	1.14e-34	H2-T23
ENSMUSG00000029103	73.72	69.71	71.73	221.29	150.81	152.55	71.72	174.883	1.28595	3.33e-37	1.14e-34	Lrpap1
ENSMUSG00000041324	41.33	39.4	42.26	91.14	66.74	68.97	40.9967	75.6167	0.883198	7.54e-37	2.52e-34	Inhba
ENSMUSG00000028691	698.06	612.69	682.59	1781.65	1249.51	1368.84	664.447	1466.67	1.14232	9.74e-37	3.19e-34	Prdx1
ENSMUSG00000032915	8.18	7.14	7.4	0.85	1.6	1.62	7.57333	1.35667	-2.48086	2.18e-36	6.99e-34	Adgre4
ENSMUSG00000030208	8.65	7.87	8.18	25.65	19.06	20.85	8.23333	21.8533	1.4083	5.47e-36	1.72e-33	Emp1
ENSMUSG00000022096	6.55	7.19	6.92	2.6	2.54	2.82	6.88667	2.65333	-1.376	2.14e-35	6.6e-33	Hr
ENSMUSG00000052776	39.72	31.82	36.04	71.97	90.48	83.47	35.86	81.9733	1.19278	5.78e-35	1.75e-32	Oas1a
ENSMUSG00000029322	181.08	179.09	192.28	306.69	359.54	358.39	184.15	341.54	0.891173	1.35e-34	4.03e-32	Plac8
ENSMUSG00000061232	268.42	260.33	269.4	518.19	460.8	422.17	266.05	467.053	0.81189	9.39e-33	2.74e-30	H2-K1
ENSMUSG00000045932	7.78	5.27	6.41	15.71	17.51	15.95	6.48667	16.39	1.33727	9.58e-33	2.75e-30	Ifit2
ENSMUSG00000032024	2.18	2.19	2.46	7.73	6.05	6.49	2.27667	6.75667	1.56939	1.88e-32	5.28e-30	Clmp
ENSMUSG00000033717	5.14	4.6	4.62	0.79	1.27	1.05	4.78667	1.03667	-2.20707	4.25e-32	1.18e-29	Adra2a
ENSMUSG00000009376	10.38	10.63	10.71	20.28	18.35	17.97	10.5733	18.8667	0.835409	4.53e-32	1.23e-29	Met
ENSMUSG00000034459	4.88	2.95	4.48	12.96	17.56	17.4	4.10333	15.9733	1.9608	6.81e-32	1.79e-29	Ifit1
ENSMUSG00000073491	2.16	1.43	1.82	8.25	10.19	9.44	1.80333	9.29333	2.36553	8.62e-32	2.23e-29	Ifi213
ENSMUSG00000041827	2.32	1.33	1.59	7.33	9.65	8.78	1.74667	8.58667	2.29749	2.63e-31	6.7e-29	Oasl1
ENSMUSG00000028048	61.37	64.98	66.12	103.64	99.53	99.83	64.1567	101	0.654684	2.08e-30	5.22e-28	Gba
ENSMUSG00000056116	24.54	23.14	25.81	49.23	45.44	43.32	24.4967	45.9967	0.908944	2.19e-30	5.41e-28	H2-T22
ENSMUSG00000003363	67.8	71.39	69.56	109.81	107.58	103.64	69.5833	107.01	0.620932	2.82e-30	6.87e-28	Pld3
ENSMUSG00000021190	61.78	65.02	64.74	100.64	116.48	105.89	63.8467	107.67	0.753933	3.43e-30	8.22e-28	Lgmn
ENSMUSG00000015501	2.75	2.98	2.43	0.79	0.97	0.85	2.72	0.87	-1.64452	3.95e-30	9.32e-28	Hivep2
ENSMUSG00000035042	32.1	22.29	27.01	90.74	81.54	68.7	27.1333	80.3267	1.56581	8.15e-30	1.9e-27	Ccl5
ENSMUSG00000050370	4.35	4.24	3.81	13.66	12.19	12.59	4.13333	12.8133	1.63227	1.73e-29	3.97e-27	Ch25h
ENSMUSG00000030921	45.15	37.68	41.67	69.08	77.82	76.35	41.5	74.4167	0.842514	1.87e-29	4.24e-27	Trim30a
ENSMUSG00000054404	27.13	21.69	24.87	50.46	58.06	60.22	24.5633	56.2467	1.19526	4.96e-29	1.11e-26	Slfn5
ENSMUSG00000072572	3.52	3.19	3.14	9.71	9.39	8.37	3.28333	9.15667	1.47966	6.55e-29	1.44e-26	Slc39a2
ENSMUSG00000057596	22.25	17.27	19.34	41.27	39.28	39.24	19.62	39.93	1.02515	1.4e-28	3.05e-26	Trim30d
ENSMUSG00000022014	22.74	21.25	21.05	37.95	43.49	40.87	21.68	40.77	0.911143	3.01e-28	6.44e-26	Epsti1
ENSMUSG00000019970	26.81	27.42	25.64	53.88	71.27	64.38	26.6233	63.1767	1.2467	5.24e-27	1.1e-24	Sgk1
ENSMUSG00000045312	20.03	19.99	18.78	29.51	31.86	30.97	19.6	30.78	0.65114	5.27e-27	1.1e-24	Lhfpl2
ENSMUSG00000026365	1.61	2.28	1.66	0.16	0.16	0.18	1.85	0.166667	-3.47249	1.21e-26	2.48e-24	Cfh
ENSMUSG00000042286	12.78	11.23	13.29	6.52	7.14	6.28	12.4333	6.64667	-0.90351	2.67e-26	5.42e-24	Stab1
ENSMUSG00000040483	14.05	10.48	9.44	28.49	34.71	32.57	11.3233	31.9233	1.49531	6.7e-26	1.34e-23	Xaf1
ENSMUSG00000053835	13.82	9.39	12.23	25.62	30.07	28.19	11.8133	27.96	1.24295	1.74e-25	3.45e-23	H2-T24
ENSMUSG00000037321	28.5	25.99	27.08	43.21	43.22	41.42	27.19	42.6167	0.648342	1.97e-25	3.85e-23	Tap1
ENSMUSG00000030214	98.77	99.28	100.79	47.51	55.82	57.95	99.6133	53.76	-0.889806	2.32e-25	4.49e-23	Plbd1
ENSMUSG00000035208	12.7	10.21	11.83	22.62	35.29	30.35	11.58	29.42	1.34516	1.64e-24	3.11e-22	Slfn8
ENSMUSG00000079018	43.49	38.39	44.8	75.69	86.21	75.28	42.2267	79.06	0.904794	2.49e-24	4.66e-22	Ly6c1
ENSMUSG00000017830	13.6	11.84	12.62	22.07	25.34	25.18	12.6867	24.1967	0.931495	2.83e-24	5.22e-22	Dhx58
ENSMUSG00000029798	8.43	6.79	7.18	13.59	14.09	13.38	7.46667	13.6867	0.874235	4.24e-24	7.65e-22	Herc6
ENSMUSG00000026104	65.31	57.8	58.41	87.83	95.26	94.36	60.5067	92.4833	0.612099	5.55e-24	9.91e-22	Stat1
ENSMUSG00000028184	3.65	4.62	4.08	8.55	10.11	10.7	4.11667	9.78667	1.24934	8.03e-24	1.42e-21	Adgrl2
ENSMUSG00000025431	1.73	3.01	2.55	8.58	10.94	11.49	2.43	10.3367	2.08874	8.21e-24	1.43e-21	Crisp1
ENSMUSG00000021996	288.95	290.43	312.39	434.79	441.27	484.76	297.257	453.607	0.609733	1.06e-23	1.84e-21	Esd
ENSMUSG00000044583	15.9	15.95	16.49	29.79	24.92	25.71	16.1133	26.8067	0.734337	1.1e-23	1.89e-21	Tlr7
ENSMUSG00000004707	12.46	12.19	12.69	21.31	26.38	23.75	12.4467	23.8133	0.93601	2.4e-23	4.01e-21	Ly9
ENSMUSG00000036381	80.8	78.9	79.63	142.26	122.04	114.08	79.7767	126.127	0.660835	5.09e-23	8.42e-21	P2ry14
ENSMUSG00000036853	0.83	1.56	1.32	4.3	5.92	4.41	1.23667	4.87667	1.97944	5.72e-23	9.37e-21	Mcoln3
ENSMUSG00000074896	4.94	2.52	3.12	11.38	17.24	17.41	3.52667	15.3433	2.12123	6.79e-23	1.1e-20	Ifit3
ENSMUSG00000033066	61.34	60.36	66.81	41.6	42.04	37.57	62.8367	40.4033	-0.637132	1.24e-22	1.98e-20	Gas7
ENSMUSG00000073489	41.07	32.76	36.72	64.4	94.04	90.15	36.85	82.8633	1.16907	1.31e-22	2.06e-20	Ifi204
ENSMUSG00000028124	72.75	67.87	68.12	114.08	100.43	111.41	69.58	108.64	0.642811	2.21e-22	3.45e-20	Gclm
ENSMUSG00000025492	463.5	440.87	458.53	1085.7	779.68	790.11	454.3	885.163	0.962298	2.35e-22	3.63e-20	Ifitm3
ENSMUSG00000018774	222.32	241.39	225.13	390.45	334.16	340.06	229.613	354.89	0.628166	8.9e-22	1.36e-19	Cd68
ENSMUSG00000075602	57.94	40.57	51.06	465.82	295.65	266.45	49.8567	342.64	2.78084	1.64e-21	2.48e-19	Ly6a
ENSMUSG00000018927	3254.51	3280.71	3312.25	4461.23	5045.94	5302.83	3282.49	4936.67	0.588747	1.8e-21	2.7e-19	Ccl6
ENSMUSG00000079481	12.67	12.48	12.81	7.44	8.25	8	12.6533	7.89667	-0.680202	2.36e-21	3.48e-19	Nhsl2
ENSMUSG00000043263	32.24	23.33	25.84	48.13	61.47	59.66	27.1367	56.42	1.05596	3.73e-21	5.4e-19	Ifi209
ENSMUSG00000104713	4.83	3.25	3.91	9.7	12.88	10.54	3.99667	11.04	1.46587	6.2e-21	8.81e-19	Gbp6
ENSMUSG00000022565	28.97	30.05	28.53	18.61	19.58	19.46	29.1833	19.2167	-0.602787	1.29e-20	1.81e-18	Plec
ENSMUSG00000026896	11.41	10.45	11.11	17.46	18.67	19.76	10.99	18.63	0.761436	1.33e-20	1.86e-18	Ifih1
ENSMUSG00000078921	1.58	1.01	1.22	4.31	6.34	4.43	1.27	5.02667	1.98477	1.55e-20	2.13e-18	Tgtp2
ENSMUSG00000047810	42.18	42.82	39.85	28.42	27.19	25.91	41.6167	27.1733	-0.61497	1.74e-20	2.36e-18	Ccdc88b
ENSMUSG00000022816	0.59	0.21	0.24	4.31	2.36	2.36	0.346667	3.01	3.11814	2.64e-20	3.57e-18	Fstl1
ENSMUSG00000032420	23.99	23.75	24.65	44.09	35.45	38.87	24.13	39.47	0.709929	3.82e-20	5.12e-18	Nt5e
ENSMUSG00000032690	15.79	11.99	14.47	24.8	34.01	32.1	14.0833	30.3033	1.10549	4.18e-20	5.55e-18	Oas2
ENSMUSG00000022661	1.1	0.99	1.07	5.65	3.92	3.68	1.05333	4.41667	2.068	5.25e-20	6.92e-18	Cd200
ENSMUSG00000000318	28.99	31.59	32.06	14.74	17.72	15.37	30.88	15.9433	-0.953719	1.14e-19	1.49e-17	Clec10a
ENSMUSG00000060311	8.93	9.11	7.47	0.24	0.93	1.19	8.50333	0.786667	-3.4342	1.35e-19	1.75e-17	Mucl1
ENSMUSG00000024661	4413.44	4464.05	4428.14	9857.88	6948.71	7514.24	4435.21	8106.94	0.870156	1.64e-19	2.1e-17	Fth1
ENSMUSG00000118667	1.35	1.26	1.4	2.99	2.87	2.38	1.33667	2.74667	1.03904	2.82e-19	3.56e-17	Ahnak2
ENSMUSG00000000805	144.23	151.89	143.61	214.68	276.38	295.74	146.577	262.267	0.839379	4.42e-19	5.54e-17	Car4
ENSMUSG00000045362	19.37	16.95	17.6	29.88	27.05	28.35	17.9733	28.4267	0.661387	5.03e-19	6.26e-17	Tnfrsf26
ENSMUSG00000024672	1.45	1.61	1.79	11.52	6.55	6.16	1.61667	8.07667	2.32074	5.37e-19	6.63e-17	Ms4a7
ENSMUSG00000022102	71.48	77.24	68.68	41.65	43.71	46.11	72.4667	43.8233	-0.725618	5.42e-19	6.65e-17	Dok2
ENSMUSG00000066677	1.2	0.65	0.76	2.75	4.95	4.55	0.87	4.08333	2.23066	6.45e-19	7.84e-17	Ifi208
ENSMUSG00000069833	62.34	64.05	63.46	33.72	40.59	40.94	63.2833	38.4167	-0.720093	1.11e-18	1.32e-16	Ahnak
ENSMUSG00000031438	18.42	15.43	17.35	27.93	27.22	27.94	17.0667	27.6967	0.698531	1.15e-18	1.37e-16	Rnf128
ENSMUSG00000073555	1.25	0.85	1.19	3.67	4.06	3.63	1.09667	3.78667	1.7878	1.27e-18	1.5e-16	Gm4951
ENSMUSG00000010066	1.88	1.66	1.8	0.37	0.34	0.55	1.78	0.42	-2.08342	2.05e-18	2.41e-16	Cacna2d2
ENSMUSG00000027611	18.42	17.49	19.92	131.33	73.89	78.92	18.61	94.7133	2.34749	2.39e-18	2.78e-16	Procr
ENSMUSG00000073409	3.15	3.64	3.18	14.01	9.91	7.23	3.32333	10.3833	1.64357	2.6e-18	3.01e-16	H2-Q6
ENSMUSG00000000204	35.06	25.39	30.8	86.1	134.94	129.74	30.4167	116.927	1.94267	3.1e-18	3.55e-16	Slfn4
ENSMUSG00000000278	31.26	34.56	33.33	56.76	48.48	50.48	33.05	51.9067	0.65127	4.22e-18	4.78e-16	Scpep1
ENSMUSG00000078763	75.39	65.5	71.55	101.25	123.94	121.44	70.8133	115.543	0.706341	7.51e-18	8.43e-16	Slfn1
ENSMUSG00000026471	7.98	6.94	8.15	12.98	15.27	15.52	7.69	14.59	0.923924	9.37e-18	1.04e-15	Mr1
ENSMUSG00000027078	12.74	10.62	12.23	20.75	26.65	24.15	11.8633	23.85	1.00748	1.14e-17	1.25e-15	Ube2l6
ENSMUSG00000039236	9.76	7.46	7.38	18.99	18	20.13	8.2	19.04	1.21534	1.17e-17	1.28e-15	Isg20
ENSMUSG00000040033	27.25	22.86	23.69	36.86	36.56	38.12	24.6	37.18	0.595868	3.57e-17	3.85e-15	Stat2
ENSMUSG00000023349	783.75	767.2	778.61	1461.2	1122.93	1152.69	776.52	1245.61	0.681754	3.7e-17	3.96e-15	Clec4n
ENSMUSG00000031266	15.95	17.28	16.71	28.09	25.67	26.57	16.6467	26.7767	0.685743	4.78e-17	5.05e-15	Gla
ENSMUSG00000046879	22.44	16.83	21.43	33.45	45.22	45.67	20.2333	41.4467	1.03452	5.2e-17	5.46e-15	Irgm1
ENSMUSG00000026358	29.28	27.67	28.89	46.85	42.33	42.12	28.6133	43.7667	0.613145	1.02e-16	1.05e-14	Rgs1
ENSMUSG00000004730	54.92	55.88	56.25	116.28	85.87	78.25	55.6833	93.4667	0.747206	1.28e-16	1.31e-14	Adgre1
ENSMUSG00000035914	1.34	1.82	1.32	3.85	4.04	3.73	1.49333	3.87333	1.37504	2.41e-16	2.4e-14	Cd276
ENSMUSG00000035929	14.13	14.62	16.1	27.3	26.17	23.22	14.95	25.5633	0.77393	2.67e-16	2.64e-14	H2-Q4
ENSMUSG00000031779	225.68	206.43	224.05	127.81	137.31	150.58	218.72	138.567	-0.658505	2.78e-16	2.74e-14	Ccl22
ENSMUSG00000047592	9.16	9.16	9.26	4.39	3.34	4.58	9.19333	4.10333	-1.16379	3.15e-16	3.09e-14	Nxpe5
ENSMUSG00000054008	19.95	21.92	21.68	11.25	13.23	12.32	21.1833	12.2667	-0.788186	3.24e-16	3.15e-14	Ndst1
ENSMUSG00000022103	1.55	1.37	1.82	0.15	0.38	0.13	1.58	0.22	-2.84435	3.39e-16	3.28e-14	Gfra2
ENSMUSG00000004105	2.37	2.49	2.56	19.54	10.32	11.02	2.47333	13.6267	2.4619	4.71e-16	4.53e-14	Angptl2
ENSMUSG00000062007	5.27	4.43	5.27	9.65	11.63	12.88	4.99	11.3867	1.19023	5.77e-16	5.52e-14	Hsh2d
ENSMUSG00000078853	10.55	9.18	10.18	16.17	18.09	18.18	9.97	17.48	0.81004	1.08e-15	1.01e-13	Igtp
ENSMUSG00000036086	9.48	9.54	10.34	14.32	15.22	16.06	9.78667	15.2	0.635182	1.28e-15	1.19e-13	Zranb3
ENSMUSG00000028111	3.38	3.34	3.24	7.17	9.78	9.04	3.32	8.66333	1.38374	1.49e-15	1.38e-13	Ctsk
ENSMUSG00000038807	5.02	5.98	5.24	2.58	2.27	3.11	5.41333	2.65333	-1.02871	1.82e-15	1.67e-13	Rap1gap2
ENSMUSG00000038384	8.42	8.5	7.65	5.38	4.99	4.8	8.19	5.05667	-0.695677	2.59e-15	2.33e-13	Setd1b
ENSMUSG00000064043	9.23	10.3	9.25	6.09	5.47	5.37	9.59333	5.64333	-0.765485	3.08e-15	2.76e-13	Trerf1
ENSMUSG00000044468	4.83	5.22	5.37	7.75	9.55	8.94	5.14	8.74667	0.766965	3.27e-15	2.91e-13	Tent5c
ENSMUSG00000002885	33.33	34.99	35.82	17.79	21.62	23.67	34.7133	21.0267	-0.72327	4.5e-15	3.93e-13	Adgre5
ENSMUSG00000078920	17.34	13.82	14.85	24.77	29.63	28.43	15.3367	27.61	0.848206	6.09e-15	5.26e-13	Ifi47
ENSMUSG00000038970	13.21	13.62	13.29	7.49	8.53	8.92	13.3733	8.31333	-0.68586	7.34e-15	6.27e-13	Lmtk2
ENSMUSG00000044716	0.4	0.37	0.39	3.59	2.24	1.69	0.386667	2.50667	2.69661	1.25e-14	1.05e-12	Dok7
ENSMUSG00000034832	11.7	12.13	11.3	7.34	7.51	7.88	11.71	7.57667	-0.628106	1.63e-14	1.35e-12	Tet3
ENSMUSG00000038507	18.17	15.19	15.49	23.83	31.88	31.54	16.2833	29.0833	0.836797	1.7e-14	1.4e-12	Parp12
ENSMUSG00000036887	28.64	29.3	31.66	9.68	14.09	14.94	29.8667	12.9033	-1.21079	1.78e-14	1.45e-12	C1qa
ENSMUSG00000019558	4.82	3.78	4.79	10.59	10.7	7.77	4.46333	9.68667	1.11788	2.2e-14	1.75e-12	Slc6a8
ENSMUSG00000024174	14.2	12.76	14.88	6.2	8.71	8.15	13.9467	7.68667	-0.85949	2.27e-14	1.79e-12	Pot1b
ENSMUSG00000042744	8.2	7.82	7.79	4.4	4.61	5.07	7.93667	4.69333	-0.75792	2.29e-14	1.8e-12	Hectd4
ENSMUSG00000050390	2.03	1.89	1.49	4.79	3.84	3.56	1.80333	4.06333	1.172	2.57e-14	2.01e-12	C77080
ENSMUSG00000044811	42.93	40.99	43.18	81.95	63.53	64.28	42.3667	69.92	0.722776	2.59e-14	2.01e-12	Cd300c2
ENSMUSG00000039477	13.45	14.55	13.72	9.43	9.13	8.84	13.9067	9.13333	-0.606563	3.22e-14	2.47e-12	Tnrc18
ENSMUSG00000024990	0.23	0.05	0.2	1.95	5.72	4.52	0.16	4.06333	4.66652	3.43e-14	2.61e-12	Rbp4
ENSMUSG00000035847	9.64	8.94	7.66	4	5	4.32	8.74667	4.44	-0.978174	4e-14	3e-12	Ids
ENSMUSG00000046207	19.13	18.91	18.71	12.54	11.4	11.67	18.9167	11.87	-0.672338	4.14e-14	3.09e-12	Pik3r6
ENSMUSG00000026069	9.66	8.72	8.8	2.37	3.5	4.68	9.06	3.51667	-1.3653	5.17e-14	3.79e-12	Il1rl1
ENSMUSG00000048216	5.01	5.5	5.1	1.85	2	2.28	5.20333	2.04333	-1.34851	7.22e-14	5.2e-12	Gpr85
ENSMUSG00000070327	48.95	38.58	41.95	71.62	85.59	86.88	43.16	81.3633	0.914684	9.66e-14	6.86e-12	Rnf213
ENSMUSG00000060550	3.34	3.07	2.6	13.16	9.17	6.56	3.00333	9.63	1.68097	1.53e-13	1.08e-11	H2-Q7
ENSMUSG00000028341	7.71	6.68	7.31	4.1	3.19	3.87	7.23333	3.72	-0.959358	1.85e-13	1.29e-11	Nr4a3
ENSMUSG00000034226	2.97	2.79	3.41	14.51	8.08	7.2	3.05667	9.93	1.69983	1.95e-13	1.35e-11	Rhov
ENSMUSG00000024535	8.41	7.94	8.23	13.9	13.53	14.17	8.19333	13.8667	0.759099	2.28e-13	1.57e-11	Snx24
ENSMUSG00000027832	53.13	49.64	51.69	94.75	70.02	78.96	51.4867	81.2433	0.658051	4.08e-13	2.75e-11	Ptx3
ENSMUSG00000058135	72.4	75.61	70.9	159.5	107.6	115.36	72.97	127.487	0.804971	4.43e-13	2.98e-11	Gstm1
ENSMUSG00000040562	2.13	1.61	1.97	18.34	6.64	6.64	1.90333	10.54	2.46927	4.84e-13	3.23e-11	Gstm2
ENSMUSG00000048154	20.17	16.6	17.52	13.81	10.35	11.4	18.0967	11.8533	-0.610431	5.14e-13	3.41e-11	Kmt2d
ENSMUSG00000028327	0.72	0.65	0.47	1.92	1.93	1.89	0.613333	1.91333	1.64134	5.68e-13	3.76e-11	Stra6l
ENSMUSG00000073490	24.06	20.53	21.67	30.19	39.58	36.34	22.0867	35.37	0.679351	5.82e-13	3.83e-11	Ifi207
ENSMUSG00000027544	6.66	7.03	6.58	3.99	4.43	3.94	6.75667	4.12	-0.713667	6.39e-13	4.19e-11	Nfatc2
ENSMUSG00000058056	4.24	4.22	3.7	1.82	1.63	2	4.05333	1.81667	-1.15782	6.79e-13	4.43e-11	Palld
ENSMUSG00000017737	83.57	80.54	82.11	34.78	43.78	53.57	82.0733	44.0433	-0.89799	7.08e-13	4.6e-11	Mmp9
ENSMUSG00000028517	0.84	0.71	0.83	1.99	2.6	2.72	0.793333	2.43667	1.61891	8.85e-13	5.68e-11	Plpp3
ENSMUSG00000009654	1.29	1.62	1.1	4.2	3.57	3.16	1.33667	3.64333	1.44662	9.53e-13	6.06e-11	Oit3
ENSMUSG00000068245	4.26	3.41	3.46	8.86	9.14	7.38	3.71	8.46	1.18924	1.67e-12	1.04e-10	Phf11d
ENSMUSG00000012519	13.04	12.65	13.42	19.15	19.88	20.1	13.0367	19.71	0.596353	2.11e-12	1.29e-10	Mlkl
ENSMUSG00000022489	16.77	14.67	14.77	8.73	8.61	9.73	15.4033	9.02333	-0.77151	2.64e-12	1.61e-10	Pde1b
ENSMUSG00000024462	13.5	11.78	11.88	7.29	7.36	7.23	12.3867	7.29333	-0.764138	2.81e-12	1.7e-10	Gabbr1
ENSMUSG00000036006	19.69	20.88	21.62	10.88	13.44	13.44	20.73	12.5867	-0.719824	2.93e-12	1.77e-10	Ripor2
ENSMUSG00000042292	21.47	22.91	21.32	14.41	14.66	14.46	21.9	14.51	-0.593883	2.96e-12	1.78e-10	Mrtfa
ENSMUSG00000052336	1.36	1.57	1.64	0.43	0.29	0.29	1.52333	0.336667	-2.17784	3.55e-12	2.12e-10	Cx3cr1
ENSMUSG00000069874	10.41	10.06	10.97	14.38	17.47	17.72	10.48	16.5233	0.656866	3.86e-12	2.28e-10	Irgm2
ENSMUSG00000021880	17.48	17.98	16.98	6.61	10.54	8.87	17.48	8.67333	-1.01105	3.88e-12	2.28e-10	Rnase6
ENSMUSG00000002028	6.69	7.9	8.22	5.09	4.03	4.17	7.60333	4.43	-0.779325	4.1e-12	2.41e-10	Kmt2a
ENSMUSG00000031078	5.71	6.14	6.21	2.15	2.64	3.2	6.02	2.66333	-1.17653	4.82e-12	2.78e-10	Cttn
ENSMUSG00000085795	40.81	37.43	36.37	19.66	23.54	26.36	38.2033	23.1867	-0.720403	5.97e-12	3.43e-10	Zfp703
ENSMUSG00000026536	22.1	15.25	18.83	44.06	68.27	66.28	18.7267	59.5367	1.66868	8.28e-12	4.7e-10	Ifi211
ENSMUSG00000072601	25.17	25.56	30.9	46.37	42.39	47.92	27.21	45.56	0.743631	1.07e-11	6.02e-10	Ear1
ENSMUSG00000037548	28.13	28.45	26.31	17.78	13.3	13.45	27.63	14.8433	-0.89642	1.08e-11	6.07e-10	H2-DMb2
ENSMUSG00000002227	6.3	5.53	5.32	10.45	8.91	9.21	5.71667	9.52333	0.736292	1.29e-11	7.06e-10	Mov10
ENSMUSG00000058006	4.14	4.78	4.5	2.83	2.93	3.01	4.47333	2.92333	-0.613736	1.33e-11	7.24e-10	Mdn1
ENSMUSG00000026579	12.11	13.54	12.92	6.63	8.13	8.55	12.8567	7.77	-0.72653	1.67e-11	9.08e-10	F5
ENSMUSG00000009621	5.05	5.58	4.98	2.9	3.08	2.89	5.20333	2.95667	-0.815465	2.17e-11	1.16e-09	Vav2
ENSMUSG00000079363	2.19	2.92	2.82	5.26	6.1	5.57	2.64333	5.64333	1.09419	2.6e-11	1.37e-09	Gbp4
ENSMUSG00000022885	6.56	7.74	6.93	2.75	3.35	3.75	7.07667	3.28333	-1.10791	3.87e-11	2.01e-09	St6gal1
ENSMUSG00000024675	3.4	3.64	3.04	7.43	10.81	11.13	3.36	9.79	1.54285	4.21e-11	2.18e-09	Ms4a4c
ENSMUSG00000027555	7.29	6.14	5.9	10.35	11.01	11.62	6.44333	10.9933	0.77075	4.79e-11	2.46e-09	Car13
ENSMUSG00000062488	0.69	0.23	0.51	1.88	2.79	2.52	0.476667	2.39667	2.32998	6.73e-11	3.39e-09	Ifit3b
ENSMUSG00000030223	8.57	8.94	9.26	3.36	4.97	4.78	8.92333	4.37	-1.02995	9.1e-11	4.48e-09	Ptpro
ENSMUSG00000040865	8.21	8.49	8.24	6.14	4.97	5.09	8.31333	5.4	-0.622468	9.94e-11	4.86e-09	Ino80d
ENSMUSG00000068587	8.1	7.58	7.88	2.73	4.11	5.27	7.85333	4.03667	-0.960141	1.3e-10	6.25e-09	Mgam
ENSMUSG00000060002	16.83	16.39	17.2	26.5	30.16	29.89	16.8067	28.85	0.779538	1.31e-10	6.25e-09	Chpt1
ENSMUSG00000039735	4.31	3.63	4.01	2.24	2.17	1.97	3.98333	2.12667	-0.905382	1.5e-10	7.09e-09	Fnbp1l
ENSMUSG00000052557	3.48	3.67	3.94	2.34	2.15	2.1	3.69667	2.19667	-0.750909	1.58e-10	7.48e-09	Gan
ENSMUSG00000031328	306.45	324.51	320.91	179.82	225.12	226.02	317.29	210.32	-0.593216	1.88e-10	8.85e-09	Flna
ENSMUSG00000038179	10.09	10.36	12.36	49.33	28.72	29.29	10.9367	35.78	1.70998	2.03e-10	9.48e-09	Slamf7
ENSMUSG00000019990	1.51	1.56	1.97	3.56	3.48	3.25	1.68	3.43	1.02975	2.37e-10	1.1e-08	Pde7b
ENSMUSG00000018217	9.03	8.6	7.19	12.81	15.64	14.59	8.27333	14.3467	0.794175	3.38e-10	1.53e-08	Pmp22
ENSMUSG00000094472	29.18	28.87	28.97	19.45	18.47	19.21	29.0067	19.0433	-0.607098	4.79e-10	2.11e-08	Gm21897
ENSMUSG00000029759	13.31	12.16	13.03	21.78	18.43	19.37	12.8333	19.86	0.62997	4.83e-10	2.12e-08	Pon3
ENSMUSG00000056144	11.85	8.77	9.61	15.62	16.9	16.42	10.0767	16.3133	0.695033	5.03e-10	2.2e-08	Trim34a
ENSMUSG00000074570	11.48	11.8	11.36	7.68	5.35	5.87	11.5467	6.3	-0.874053	6.31e-10	2.71e-08	Cass4
ENSMUSG00000056888	87.52	77.88	88.64	161.69	118.23	114.23	84.68	131.383	0.633689	9.04e-10	3.83e-08	Glipr1
ENSMUSG00000074519	26.86	26.64	29.23	15.21	17.94	16.54	27.5767	16.5633	-0.735455	9.1e-10	3.84e-08	Zfp971
ENSMUSG00000030162	11.77	11.08	12.12	27.54	16.68	20.69	11.6567	21.6367	0.892323	1.06e-09	4.46e-08	Olr1
ENSMUSG00000038508	1.15	1.5	0.83	5.09	2.75	3.71	1.16	3.85	1.73073	1.2e-09	5.01e-08	Gdf15
ENSMUSG00000036067	42.83	44.31	41.47	32.09	24.74	25.51	42.87	27.4467	-0.643337	1.29e-09	5.36e-08	Slc2a6
ENSMUSG00000063415	0.04	0.04	0.01	0.55	0.45	0.35	0.03	0.45	3.90689	1.3e-09	5.41e-08	Cyp26b1
ENSMUSG00000029860	155.96	163.7	151.97	88.9	106.76	112.79	157.21	102.817	-0.612619	1.31e-09	5.43e-08	Zyx
ENSMUSG00000052821	27.51	28.74	30.62	13.13	19.38	19.36	28.9567	17.29	-0.743958	1.39e-09	5.71e-08	Cysltr1
ENSMUSG00000036896	58.95	52.37	56.83	24.45	37.71	31.89	56.05	31.35	-0.838249	1.46e-09	5.94e-08	C1qc
ENSMUSG00000027068	17.8	17.98	19.1	10.96	12.28	13.2	18.2933	12.1467	-0.590758	1.66e-09	6.7e-08	Dhrs9
ENSMUSG00000043940	12.3	12.76	12.11	6.86	8.24	8.69	12.39	7.93	-0.643783	1.79e-09	7.2e-08	Wdfy3
ENSMUSG00000027583	3.33	3.15	3.14	1.68	1.62	1.88	3.20667	1.72667	-0.893085	2.02e-09	8.02e-08	Zbtb46
ENSMUSG00000031303	3.82	3.79	3.63	2.01	2.14	1.54	3.74667	1.89667	-0.982141	2.16e-09	8.52e-08	Map3k15
ENSMUSG00000022126	46.33	42.31	44.77	129.64	83.59	89.79	44.47	101.007	1.18355	2.17e-09	8.55e-08	Acod1
ENSMUSG00000026271	11.98	12.48	12.32	6.33	8.25	8.19	12.26	7.59	-0.691787	2.47e-09	9.67e-08	Gpr35
ENSMUSG00000020399	2.05	2.25	2.24	3.49	6.85	5.46	2.18	5.26667	1.27256	2.63e-09	1.03e-07	Havcr2
ENSMUSG00000041571	19.46	17.44	16.68	31.73	31.26	25.94	17.86	29.6433	0.730976	2.66e-09	1.03e-07	Selenow
ENSMUSG00000044350	17.98	18.89	19.54	12.6	11.43	12.46	18.8033	12.1633	-0.62845	2.69e-09	1.04e-07	Lacc1
ENSMUSG00000003847	17.24	14.7	23.37	14.42	8.52	12.76	18.4367	11.9	-0.631616	2.71e-09	1.05e-07	Nfat5
ENSMUSG00000058818	92.94	96.25	99.04	54.93	65.32	71.88	96.0767	64.0433	-0.585138	3.09e-09	1.18e-07	Pirb
ENSMUSG00000035000	1.42	1.72	1.3	0.66	0.49	0.48	1.48	0.543333	-1.44569	3.9e-09	1.48e-07	Dpp4
ENSMUSG00000031494	1.65	1.99	1.48	0.18	0.2	0.32	1.70667	0.233333	-2.87072	4e-09	1.51e-07	Cd209a
ENSMUSG00000004633	14.36	13.09	14.38	8.49	8.84	8.69	13.9433	8.67333	-0.684917	4.03e-09	1.52e-07	Chn2
ENSMUSG00000009418	5.7	5.88	6.46	3.29	4.55	3.76	6.01333	3.86667	-0.637075	5.5e-09	2.03e-07	Nav1
ENSMUSG00000068246	0.09	0	0.07	0.79	1.82	1.35	0.0533333	1.32	4.62936	6.22e-09	2.28e-07	Apol9b
ENSMUSG00000015852	39.21	37	40.79	18.16	27.96	23.75	39	23.29	-0.743763	6.3e-09	2.3e-07	Fcrls
ENSMUSG00000024677	1.81	1.51	2.05	3.32	4.63	4.36	1.79	4.10333	1.19684	1.19e-08	4.19e-07	Ms4a6b
ENSMUSG00000068129	19.44	18.43	19.35	47.01	28.61	29.74	19.0733	35.12	0.880736	1.45e-08	5.09e-07	Cst7
ENSMUSG00000030144	106.63	95.6	111.48	200.03	135.6	144.58	104.57	160.07	0.614234	1.66e-08	5.75e-07	Clec4d
ENSMUSG00000020415	18.27	14.66	14.9	26.18	27.41	27	15.9433	26.8633	0.752685	1.7e-08	5.87e-07	Pttg1
ENSMUSG00000024011	14.82	14.45	14.82	7.02	9.08	9.5	14.6967	8.53333	-0.784308	1.82e-08	6.28e-07	Pi16
ENSMUSG00000038400	1.22	0.89	0.81	3.25	2.46	1.97	0.973333	2.56	1.39514	3.12e-08	1.02e-06	Pmepa1
ENSMUSG00000029819	3.32	1.82	2.52	7	7.83	9.08	2.55333	7.97	1.6422	3.17e-08	1.04e-06	Npy
ENSMUSG00000034731	1.57	1.8	1.86	0.78	1.33	1.15	1.74333	1.08667	-0.681939	3.53e-08	1.15e-06	Dgkh
ENSMUSG00000060594	4.03	3.95	3.41	11.85	6.87	7.6	3.79667	8.77333	1.20839	3.63e-08	1.18e-06	Layn
ENSMUSG00000070427	4.99	5.38	5.9	10.23	10.33	9.21	5.42333	9.92333	0.871645	4.35e-08	1.4e-06	Il18bp
ENSMUSG00000027298	0.62	0.77	0.72	1.74	1.43	1.63	0.703333	1.6	1.18579	4.46e-08	1.43e-06	Tyro3
ENSMUSG00000020641	6.27	3.45	4.71	10.89	16.25	14.94	4.81	14.0267	1.54406	5.39e-08	1.7e-06	Rsad2
ENSMUSG00000006362	7.23	6.33	5.03	4.36	3.63	3.47	6.19667	3.82	-0.69792	5.83e-08	1.83e-06	Cbfa2t3
ENSMUSG00000006360	99.17	81.58	80.49	46.45	54.99	57.71	87.08	53.05	-0.714989	7.3e-08	2.24e-06	Crip1
ENSMUSG00000040133	0.26	0.28	0.29	0.78	0.87	1.03	0.276667	0.893333	1.69105	7.9e-08	2.42e-06	Gpr176
ENSMUSG00000018417	1.19	1.1	1.21	3.33	2.04	2.01	1.16667	2.46	1.07627	7.96e-08	2.43e-06	Myo1b
ENSMUSG00000091649	11.47	7.82	9.03	13.91	21.06	18.37	9.44	17.78	0.913397	8.81e-08	2.66e-06	Phf11b
ENSMUSG00000095547	0	0	0	1.93	2.13	0.84	0.001	1.63333	10.6736	1.15e-07	3.38e-06	Gm10719
ENSMUSG00000027997	26.42	25.84	27.94	13.05	17.74	17.89	26.7333	16.2267	-0.720273	1.23e-07	3.58e-06	Casp6
ENSMUSG00000029605	2.61	2.35	1.94	4.29	5.53	4.37	2.3	4.73	1.04021	1.25e-07	3.62e-06	Oas1b
ENSMUSG00000031530	0.49	0.43	0.61	2.66	1.29	1.32	0.51	1.75667	1.78427	1.43e-07	4.13e-06	Dusp4
ENSMUSG00000017002	61.42	53.97	59.36	119.11	76.29	81.96	58.25	92.4533	0.666467	1.45e-07	4.16e-06	Slpi
ENSMUSG00000022586	44.04	32.72	42.27	204.07	106.9	107.31	39.6767	139.427	1.81314	1.48e-07	4.24e-06	Ly6i
ENSMUSG00000013584	5.65	4.05	4.41	2.21	1.79	2.45	4.70333	2.15	-1.12935	1.52e-07	4.34e-06	Aldh1a2
ENSMUSG00000028007	7.9	7.02	7.05	10.34	12.32	11.56	7.32333	11.4067	0.639305	1.53e-07	4.36e-06	Snx7
ENSMUSG00000025104	5.33	4.66	4.82	2.39	3.41	2.98	4.93667	2.92667	-0.754279	1.66e-07	4.71e-06	Hdgfl3
ENSMUSG00000055485	3.99	4.53	3.72	2.55	2.81	2.35	4.08	2.57	-0.666801	1.74e-07	4.93e-06	Soga1
ENSMUSG00000050957	7.28	5.61	6.05	27.08	14.16	10.37	6.31333	17.2033	1.44621	1.8e-07	5.08e-06	Insl6
ENSMUSG00000025986	5.73	5.69	6.26	3.87	3.93	3.47	5.89333	3.75667	-0.649631	2.01e-07	5.64e-06	Slc39a10
ENSMUSG00000015942	5.54	5.75	5.75	2.58	3.03	2.77	5.68	2.79333	-1.0239	2.52e-07	6.94e-06	Gtf2ird2
ENSMUSG00000037418	3.23	2.73	2.91	11.52	4.48	6.14	2.95667	7.38	1.31965	2.78e-07	7.62e-06	Best1
ENSMUSG00000031367	40.73	36.23	39.82	20.52	28.23	26.6	38.9267	25.1167	-0.632114	3.02e-07	8.21e-06	Ap1s2
ENSMUSG00000019843	5.71	5.36	4.48	2.86	2.83	3.1	5.18333	2.93	-0.82298	3.1e-07	8.4e-06	Fyn
ENSMUSG00000046080	0.94	1.54	1.61	8.16	2.98	3.08	1.36333	4.74	1.79775	3.51e-07	9.43e-06	Clec9a
ENSMUSG00000016206	8.11	8.59	9.43	14.48	14.88	11.71	8.71	13.69	0.652378	3.54e-07	9.49e-06	H2-M3
ENSMUSG00000029516	8.96	9.83	9.93	5.1	5.16	6.32	9.57333	5.52667	-0.792612	4.02e-07	1.07e-05	Cit
ENSMUSG00000025408	11.16	9.33	10.47	21.73	17.72	15.07	10.32	18.1733	0.81638	4.24e-07	1.12e-05	Ddit3
ENSMUSG00000023367	5.89	6.13	6.78	3.73	2.23	1.81	6.26667	2.59	-1.27475	4.57e-07	1.2e-05	Tmem176a
ENSMUSG00000022265	8.68	9.13	8.56	4.75	5.53	6.31	8.79	5.53	-0.668584	5.29e-07	1.37e-05	Ank
ENSMUSG00000068735	5	6.07	5.26	2.95	2.68	3.36	5.44333	2.99667	-0.861132	5.8e-07	1.49e-05	Trp53i11
ENSMUSG00000020785	1.16	1.12	1.12	0.24	0.45	0.43	1.13333	0.373333	-1.60204	6.18e-07	1.57e-05	Camkk1
ENSMUSG00000003355	5.95	6.47	6.68	11.81	10.51	12.85	6.36667	11.7233	0.880773	6.97e-07	1.76e-05	Fkbp11
ENSMUSG00000027030	3.9	4.06	4.04	2.13	2.05	2.6	4	2.26	-0.823677	7.86e-07	1.96e-05	Stk39
ENSMUSG00000029108	5.33	5.74	5.44	2.31	3.64	3.97	5.50333	3.30667	-0.734928	7.96e-07	1.97e-05	Pcdh7
ENSMUSG00000033826	0.75	0.98	0.81	0.42	0.46	0.4	0.846667	0.426667	-0.988685	9.17e-07	2.24e-05	Dnah8
ENSMUSG00000030427	35.97	36.16	35.16	16.48	25.61	24.15	35.7633	22.08	-0.695741	1.22e-06	2.91e-05	Lilra6
ENSMUSG00000017754	21.97	24.53	22.07	4.71	7.56	9.88	22.8567	7.38333	-1.63027	1.25e-06	2.98e-05	Pltp
ENSMUSG00000110519	2.17	1.89	1.9	1.1	1.28	1.13	1.98667	1.17	-0.763841	1.25e-06	2.99e-05	Olfr839-ps1
ENSMUSG00000029816	178.34	173.06	183.8	1125.72	493.68	498.51	178.4	705.97	1.98449	1.45e-06	3.4e-05	Gpnmb
ENSMUSG00000037235	11.73	11.77	12.69	5.23	8.23	7.73	12.0633	7.06333	-0.772208	1.54e-06	3.58e-05	Mxd4
ENSMUSG00000073664	3.72	3.13	3.63	2.56	2.18	2.23	3.49333	2.32333	-0.588408	1.64e-06	3.8e-05	Nbeal1
ENSMUSG00000020589	3.96	3.61	3.67	2.67	1.95	1.78	3.74667	2.13333	-0.812498	1.73e-06	4e-05	Cyria
ENSMUSG00000048232	2.73	2.42	2.84	0.92	1.51	1.56	2.66333	1.33	-1.00181	1.78e-06	4.08e-05	Fbxo10
ENSMUSG00000027932	3.13	2.62	3.1	0.72	1.58	1.21	2.95	1.17	-1.33421	1.89e-06	4.31e-05	Slc27a3
ENSMUSG00000001062	8.71	8.36	8.6	5.98	5.53	5.46	8.55667	5.65667	-0.597097	2.07e-06	4.7e-05	Vps9d1
ENSMUSG00000022562	1.07	0.58	1.15	2.17	1.38	1.4	0.933333	1.65	0.822002	2.4e-06	5.37e-05	Oplah
ENSMUSG00000040860	2.15	1.83	1.91	0.66	0.66	0.59	1.96333	0.636667	-1.62469	2.41e-06	5.39e-05	Crocc
ENSMUSG00000030516	0.84	0.68	0.76	1.57	1.36	1.23	0.76	1.38667	0.86755	2.48e-06	5.52e-05	Tjp1
ENSMUSG00000001227	8.13	8.86	7.9	4.6	5.7	5.65	8.29667	5.31667	-0.64201	2.63e-06	5.81e-05	Sema6b
ENSMUSG00000042770	5.24	4.63	5.22	8.61	8.08	9.29	5.03	8.66	0.783809	2.84e-06	6.2e-05	Hebp1
ENSMUSG00000030109	16.93	14.16	17.79	28.71	21.48	23.32	16.2933	24.5033	0.588696	2.93e-06	6.37e-05	Slc6a12
ENSMUSG00000027947	18.86	18.11	18.01	8.84	13.04	13.15	18.3267	11.6767	-0.650316	2.98e-06	6.49e-05	Il6ra
ENSMUSG00000054203	2.17	1.5	1.97	3.01	5.95	4.33	1.88	4.43	1.23657	3.11e-06	6.73e-05	Ifi205
ENSMUSG00000020642	6.17	6.35	6.13	3.3	4.53	4.15	6.21667	3.99333	-0.638548	3.16e-06	6.78e-05	Rnf144a
ENSMUSG00000036098	2.38	2.92	2.78	4.82	4.08	3.86	2.69333	4.25333	0.659201	3.21e-06	6.87e-05	Myrf
ENSMUSG00000054263	1.69	2.28	2.13	1.32	1.09	1.33	2.03333	1.24667	-0.705771	3.44e-06	7.28e-05	Lifr
ENSMUSG00000022863	9.96	9.87	9.29	16.19	13.31	17.63	9.70667	15.71	0.694635	3.66e-06	7.7e-05	Btg3
ENSMUSG00000070390	4.12	3.82	3.94	1.18	2.13	2.48	3.96	1.93	-1.0369	4.44e-06	9.16e-05	Nlrp1b
ENSMUSG00000066071	0.2	0.2	0.37	0.56	1.57	1.3	0.256667	1.14333	2.15528	4.49e-06	9.25e-05	Cyp4a12a
ENSMUSG00000038473	6.06	5.26	5.94	2.82	2.33	2.33	5.75333	2.49333	-1.20632	4.84e-06	9.84e-05	Nos1ap
ENSMUSG00000055723	5.84	5.82	5.84	3.5	3.7	3.38	5.83333	3.52667	-0.726015	4.93e-06	9.98e-05	Rras2
ENSMUSG00000025085	1.73	1.98	2.02	4.8	2.57	2.68	1.91	3.35	0.810588	5.03e-06	0.000101592	Ablim1
ENSMUSG00000001348	7.68	8.69	8.59	16.66	11.72	11.56	8.32	13.3133	0.678216	5.11e-06	0.000103027	Acp5
ENSMUSG00000027322	3.23	2.74	3.12	5.37	12.43	13.16	3.03	10.32	1.76805	5.2e-06	0.000104369	Siglec1
ENSMUSG00000023809	4.51	4.65	4.47	10.55	6.14	6.26	4.54333	7.65	0.751709	5.82e-06	0.000114904	Rps6ka2
ENSMUSG00000013236	9.19	9.76	9.43	7.72	4.98	5.52	9.46	6.07333	-0.639352	6.51e-06	0.000126591	Ptprs
ENSMUSG00000044156	4.51	6.19	5.57	2.78	3.62	2.96	5.42333	3.12	-0.797634	6.56e-06	0.000127373	Hepacam2
ENSMUSG00000033720	5.39	5.51	5.27	2.93	3.45	3.77	5.39	3.38333	-0.67184	6.78e-06	0.000130957	Sfxn5
ENSMUSG00000021363	3.53	3.01	3.53	4.91	6.23	5.5	3.35667	5.54667	0.724592	6.95e-06	0.000133417	Mak
ENSMUSG00000014075	12.02	9.95	12.74	21.16	18.77	15.46	11.57	18.4633	0.674274	8.16e-06	0.000154624	Dynlt2b
ENSMUSG00000026981	388.87	398.14	416.99	1102.83	628.51	699.13	401.333	810.157	1.0134	8.86e-06	0.000166379	Il1rn
ENSMUSG00000031565	1.52	2.02	1.35	0.58	0.72	0.75	1.63	0.683333	-1.25421	1.05e-05	0.000194048	Fgfr1
ENSMUSG00000045039	2.49	2.64	2.46	1.89	1.49	1.64	2.53	1.67333	-0.596413	1.21e-05	0.000216977	Megf8
ENSMUSG00000017144	10.31	10.05	9.89	4.65	7.54	6.27	10.0833	6.15333	-0.712533	1.24e-05	0.000222467	Rnd3
ENSMUSG00000076617	11.02	11.7	11.68	5.14	8.45	6	11.4667	6.53	-0.812291	1.36e-05	0.000240151	Ighm
ENSMUSG00000079037	2.68	2.49	2.2	4.55	4.3	3.6	2.45667	4.15	0.756409	1.4e-05	0.0002466	Prnp
ENSMUSG00000040693	6.59	6.16	6.6	3.56	4.78	4.53	6.45	4.29	-0.588322	1.56e-05	0.000271953	Slco4c1
ENSMUSG00000021876	16.72	15.16	17.18	17.82	31.2	29.21	16.3533	26.0767	0.673175	1.57e-05	0.00027408	Rnase4
ENSMUSG00000000440	18.95	19.28	20.55	21.71	36.26	33.11	19.5933	30.36	0.631809	1.59e-05	0.000276822	Pparg
ENSMUSG00000028347	0.97	0.76	1.01	1.63	2.52	2.45	0.913333	2.2	1.26829	1.62e-05	0.000281214	Tmeff1
ENSMUSG00000017309	1.16	0.94	1.13	0.22	0.65	0.42	1.07667	0.43	-1.32416	1.62e-05	0.000282002	Cd300lg
ENSMUSG00000032501	6.25	6.56	7.11	3.59	4.55	4.82	6.64	4.32	-0.620152	1.66e-05	0.000287632	Trib1
ENSMUSG00000059482	3.51	3.31	3.73	6.24	5.31	4.97	3.51667	5.50667	0.646971	1.72e-05	0.000296652	2610301B20Rik
ENSMUSG00000032411	5.4	4.73	5.47	3.1	3.67	3.49	5.2	3.42	-0.604515	1.74e-05	0.000298862	Tfdp2
ENSMUSG00000041608	1.73	2.2	2.07	3.13	3.28	3.06	2	3.15667	0.658402	1.76e-05	0.000301071	Entpd3
ENSMUSG00000072244	1.88	1.56	1.88	3.86	2.85	2.72	1.77333	3.14333	0.825832	1.8e-05	0.000305866	Trim6
ENSMUSG00000063133	6.55	4.29	4.89	7.09	14.31	11.66	5.24333	11.02	1.07157	1.86e-05	0.000313531	Klk1b1
ENSMUSG00000055322	5.64	5.82	7.44	2.45	3.86	4.92	6.3	3.74333	-0.751028	2.01e-05	0.000335602	Tns1
ENSMUSG00000043467	2.5	2.34	2.87	2.04	1.41	1.49	2.57	1.64667	-0.64222	2.08e-05	0.000345704	Zbtb37
ENSMUSG00000059022	2.07	1.74	1.44	0.89	0.65	0.49	1.75	0.676667	-1.37084	2.14e-05	0.000354502	Kcp
ENSMUSG00000062464	0.74	1.02	0.85	0.16	0.32	0.23	0.87	0.236667	-1.87816	2.15e-05	0.000354924	Cyp4f37
ENSMUSG00000060586	138.31	139.45	142.62	95.46	61.36	64.13	140.127	73.65	-0.927974	2.24e-05	0.000366128	H2-Eb1
ENSMUSG00000004558	5.31	3.85	4.12	8.56	6.6	6.35	4.42667	7.17	0.695752	2.26e-05	0.000368773	Ndrg2
ENSMUSG00000021477	198.39	208	202.75	460.41	284.87	277.71	203.047	340.997	0.747946	2.47e-05	0.000397765	Ctsl
ENSMUSG00000042249	8.01	7.4	7.45	6.21	4.48	4.13	7.62	4.94	-0.62528	2.49e-05	0.000399206	Grk3
ENSMUSG00000021806	1.57	1.42	1.52	0.64	0.9	0.8	1.50333	0.78	-0.946619	2.52e-05	0.000402823	Nid2
ENSMUSG00000032841	4.71	4.72	4.04	6.37	6.97	7.74	4.49	7.02667	0.646125	2.78e-05	0.000440143	Prr5l
ENSMUSG00000030064	4.33	5.68	5.55	4.01	1.99	3.69	5.18667	3.23	-0.683273	2.88e-05	0.000452964	Frmd4b
ENSMUSG00000029919	1.03	1.16	0.81	1.98	2	1.59	1	1.85667	0.892715	2.91e-05	0.000457221	Hpgds
ENSMUSG00000075014	0	0	0	1.11	0.41	1.07	0.001	0.863333	9.75377	3e-05	0.000471011	Gm10800
ENSMUSG00000075269	3.67	3.64	3	1.11	1.67	0.99	3.43667	1.25667	-1.45141	3.05e-05	0.000475457	Bex6
ENSMUSG00000040380	1.01	0.69	0.83	0.37	0.21	0.23	0.843333	0.27	-1.64314	3.46e-05	0.000529941	Cbln3
ENSMUSG00000030592	0.2	0.23	0.22	0.11	0.06	0.04	0.216667	0.07	-1.63005	3.46e-05	0.000529941	Ryr1
ENSMUSG00000050600	0.61	0.56	0.63	0.28	0.3	0.32	0.6	0.3	-1	3.65e-05	0.000555575	Zfp831
ENSMUSG00000031740	5.45	4.67	4.79	11.85	6.76	6.45	4.97	8.35333	0.749106	3.73e-05	0.000564747	Mmp2
ENSMUSG00000023341	1.51	0.79	1.1	1.94	2.92	2.47	1.13333	2.44333	1.10828	3.76e-05	0.000569104	Mx2
ENSMUSG00000044703	1.27	1.65	1.34	2.37	3.65	3.41	1.42	3.14333	1.1464	4.06e-05	0.000609835	Phf11a
ENSMUSG00000050896	0.03	0.04	0.04	3.01	0.1	0.27	0.0366667	1.12667	4.94145	4.28e-05	0.000637461	Rtn4rl2
ENSMUSG00000024013	4.4	4.85	3.9	2.14	2.31	2.74	4.38333	2.39667	-0.870999	4.35e-05	0.000645905	Fgd2
ENSMUSG00000078485	5.2	4.84	4.86	9.89	7.34	6.53	4.96667	7.92	0.673223	4.35e-05	0.000645905	Plekhn1
ENSMUSG00000039206	9.93	11.04	10.9	4.33	7.11	7.81	10.6233	6.41667	-0.727341	4.36e-05	0.000645905	Daglb
ENSMUSG00000021690	1.59	1.6	1.46	0.7	0.98	1.06	1.55	0.913333	-0.763055	4.43e-05	0.000655318	Jmy
ENSMUSG00000019102	0.05	0	0.03	0.61	0.41	0.46	0.0266667	0.493333	4.20945	4.73e-05	0.000693552	Aldh3a1
ENSMUSG00000029223	8.61	9.28	8.37	10.51	15.07	14.83	8.75333	13.47	0.621845	4.91e-05	0.000717053	Uchl1
ENSMUSG00000021062	0.73	0.48	0.72	1.17	1.53	1.45	0.643333	1.38333	1.10451	5.31e-05	0.000767399	Rab15
ENSMUSG00000026193	496.95	540.96	488.95	54.95	162.94	195.82	508.953	137.903	-1.88388	5.33e-05	0.000770076	Fn1
ENSMUSG00000021367	3.21	3.16	3.45	7.84	4.06	5.41	3.27333	5.77	0.817811	5.44e-05	0.0007819	Edn1
ENSMUSG00000078616	4.15	4.28	4.41	5.81	6.44	7.47	4.28	6.57333	0.619014	5.47e-05	0.000784898	Trim30c
ENSMUSG00000026354	0.59	0.66	0.65	0.2	0.35	0.22	0.633333	0.256667	-1.30307	5.71e-05	0.000813829	Lct
ENSMUSG00000032470	6.26	6.34	6.72	4.33	3.97	4.46	6.44	4.25333	-0.598467	6.38e-05	0.000901286	Mras
ENSMUSG00000038349	0.35	0.36	0.32	0.12	0.09	0.11	0.343333	0.106667	-1.6865	6.49e-05	0.000912728	Plcl1
ENSMUSG00000028716	2.53	1.77	1.71	4.65	5.29	3.52	2.00333	4.48667	1.16324	6.85e-05	0.000951242	Pdzk1ip1
ENSMUSG00000007682	0.92	0.83	0.83	1.91	1.13	1.48	0.86	1.50667	0.808952	6.96e-05	0.000965054	Dio2
ENSMUSG00000060568	1.01	1.21	1.42	0.18	0.45	0.67	1.21333	0.433333	-1.48543	7.33e-05	0.00100821	Fam78b
ENSMUSG00000043391	11.49	10.62	11.76	4.74	8.09	8.41	11.29	7.08	-0.673224	7.37e-05	0.00101204	2510009E07Rik
ENSMUSG00000016283	6.97	5.77	6.6	51.26	17.33	15.98	6.44667	28.19	2.12856	8e-05	0.00109005	H2-M2
ENSMUSG00000062515	4.58	3.72	3.56	5.49	8.68	8.2	3.95333	7.45667	0.915461	8.18e-05	0.00111194	Fabp4
ENSMUSG00000002289	2.59	2.31	2.43	2.93	5.27	4.83	2.44333	4.34333	0.829952	8.56e-05	0.00115703	Angptl4
ENSMUSG00000036459	1	1	0.92	0.32	0.26	0.26	0.973333	0.28	-1.79751	8.71e-05	0.00117312	Wtip
ENSMUSG00000026249	4.36	3	3.23	4.7	6.63	5.59	3.53	5.64	0.676027	9.4e-05	0.00125792	Serpine2
ENSMUSG00000051627	0.18	0.18	0.1	0.57	0.57	1	0.153333	0.713333	2.21791	9.65e-05	0.00128592	H1f4
ENSMUSG00000045092	0.57	0.58	0.73	1.82	1.27	1.04	0.626667	1.37667	1.13541	9.66e-05	0.00128592	S1pr1
ENSMUSG00000042724	3.15	2.96	3.04	1.92	1.98	2.05	3.05	1.98333	-0.620882	9.89e-05	0.00131334	Map3k9
ENSMUSG00000028214	0.83	0.66	0.88	3.32	1.67	1.24	0.79	2.07667	1.39435	0.000102311	0.00135339	Gem
ENSMUSG00000073421	158.22	154.26	158.9	111	73.59	71.97	157.127	85.52	-0.877594	0.000102817	0.00135896	H2-Ab1
ENSMUSG00000035513	10.09	10.18	10.25	7.88	5.95	6	10.1733	6.61	-0.62207	0.000105306	0.0013873	Ntng2
ENSMUSG00000055413	1.36	0.8	0.62	3.84	2.15	2.21	0.926667	2.73333	1.56054	0.000108674	0.00142698	H2-Q5
ENSMUSG00000060671	12.81	11.76	11.99	7.81	8.25	8.21	12.1867	8.09	-0.591092	0.000111182	0.00145516	Atp8b2
ENSMUSG00000079429	1.57	1.51	1.47	0.66	1.12	0.85	1.51667	0.876667	-0.790804	0.000119697	0.00155017	Mroh2a
ENSMUSG00000078881	2.76	0.8	3.08	4.57	4.39	6.34	2.21333	5.1	1.20428	0.000120497	0.00155803	Gm14434
ENSMUSG00000030276	4.39	3.15	3.76	2.26	1.76	2.05	3.76667	2.02333	-0.896554	0.000121605	0.00156982	Ttll3
ENSMUSG00000055435	3.7	3.86	3.8	1.68	2.67	2.39	3.78667	2.24667	-0.753142	0.000130031	0.00165878	Maf
ENSMUSG00000015980	2.52	2.4	1.95	4.32	2.9	3.5	2.29	3.57333	0.641923	0.000137125	0.00173822	Lrrc27
ENSMUSG00000043795	4.24	4.33	3.75	2.46	2.58	2.32	4.10667	2.45333	-0.743225	0.000151768	0.0018908	Prr33
ENSMUSG00000057933	0	0	0	0.72	0.66	0.19	0.001	0.523333	9.03159	0.00015524	0.00192808	Gsta2
ENSMUSG00000001506	1.23	0.33	0.26	0.05	0.18	0.15	0.606667	0.126667	-2.25987	0.000156834	0.00194336	Col1a1
ENSMUSG00000040165	3.56	4.16	3.22	1.85	0.65	0.89	3.64667	1.13	-1.69026	0.000158662	0.00195997	Cd209c
ENSMUSG00000026580	1.41	1.58	1.05	0.49	0.69	0.67	1.34667	0.616667	-1.12683	0.000166033	0.00202762	Selp
ENSMUSG00000033470	0.63	0.53	0.52	1.22	1.62	1.36	0.56	1.4	1.32193	0.000169329	0.00206005	Cysltr2
ENSMUSG00000062785	0.75	0.83	0.69	0.48	0.23	0.49	0.756667	0.4	-0.919658	0.000181224	0.00218489	Kcnc3
ENSMUSG00000027377	0.15	0.15	0.24	0.63	0.86	0.59	0.18	0.693333	1.94555	0.000181744	0.00218787	Mall
ENSMUSG00000110040	9.01	10.3	7.69	14.78	10.81	18.66	9	14.75	0.712718	0.000185215	0.002223	Gm49369
ENSMUSG00000030708	2.03	2	1.75	0.95	1.27	1.03	1.92667	1.08333	-0.83063	0.00018881	0.00226276	Dnajb13
ENSMUSG00000000823	5.29	5.31	5.1	4.03	3.08	3.22	5.23333	3.44333	-0.603924	0.000189184	0.00226555	Zfp512b
ENSMUSG00000049804	0.37	0.32	0.41	0.64	0.68	0.63	0.366667	0.65	0.825971	0.000190161	0.00227217	Armcx4
ENSMUSG00000048329	0.7	0.86	0.83	0.23	0.22	0.19	0.796667	0.213333	-1.90087	0.000191649	0.00228655	Mfsd6l
ENSMUSG00000001166	3.65	2.57	3.07	4.33	4.82	4.84	3.09667	4.66333	0.590645	0.000194014	0.0023087	Oas1c
ENSMUSG00000021684	0.74	0.83	0.68	1.2	1.13	1.47	0.75	1.26667	0.756074	0.000199494	0.00236433	Pde8b
ENSMUSG00000026187	1.61	1.79	1.42	2.36	2.57	3.19	1.60667	2.70667	0.752447	0.000200764	0.00237675	Xrcc5
ENSMUSG00000022824	2.82	3.3	3.17	6.75	4.44	3.77	3.09667	4.98667	0.68736	0.000219565	0.00256623	Muc13
ENSMUSG00000000489	3.62	4.21	3.49	1.78	2.36	2.63	3.77333	2.25667	-0.741646	0.000233096	0.00271056	Pdgfb
ENSMUSG00000031391	4.13	5.03	3.88	2.39	3.06	3.13	4.34667	2.86	-0.603894	0.000238501	0.00276741	L1cam
ENSMUSG00000098078	14.28	14.24	11.08	8.75	5.36	5.31	13.2	6.47333	-1.02796	0.000247174	0.00285566	Gm26992
ENSMUSG00000025092	0.77	0.62	0.51	0.33	0.32	0.26	0.633333	0.303333	-1.06206	0.000262271	0.00298932	Hspa12a
ENSMUSG00000026475	1.61	1.4	1.28	4.79	2.17	2.05	1.43	3.00333	1.07055	0.000269589	0.00306392	Rgs16
ENSMUSG00000046318	0.55	0.32	0.56	1.5	0.66	0.69	0.476667	0.95	0.994947	0.000270222	0.00306896	Ccbe1
ENSMUSG00000091491	0.42	0.35	0.4	0.18	0.2	0.22	0.39	0.2	-0.963474	0.000296778	0.00332586	Vmn2r97
ENSMUSG00000034066	1.04	1.13	0.96	0.37	0.47	0.5	1.04333	0.446667	-1.22393	0.000306062	0.00342036	Farp2
ENSMUSG00000036528	3.74	3.44	3.91	9.28	4.73	4.43	3.69667	6.14667	0.733579	0.00031816	0.00352611	Ppfibp2
ENSMUSG00000019813	3.68	4.02	3.38	7	5.81	4.64	3.69333	5.81667	0.655269	0.000322188	0.00355847	Cep57l1
ENSMUSG00000030156	7.98	7.44	8.61	18.57	10.36	9.59	8.01	12.84	0.680771	0.000331262	0.00364116	Cd69
ENSMUSG00000002847	0.44	0.52	0.34	2.32	0.81	0.86	0.433333	1.33	1.61788	0.000354972	0.00388582	Pla1a
ENSMUSG00000071724	1.69	1.59	1.46	3.15	2.83	2.54	1.58	2.84	0.845966	0.000359042	0.00391969	Smpd5
ENSMUSG00000042099	5.09	5.65	4.67	2.08	2.67	3.16	5.13667	2.63667	-0.962117	0.000387662	0.00418097	Kank3
ENSMUSG00000071748	2.38	2.36	2.08	1.59	1.42	0.95	2.27333	1.32	-0.784271	0.000397038	0.00426206	Gm14698
ENSMUSG00000052565	0.07	0.08	0.09	0.21	0.25	0.23	0.08	0.23	1.52356	0.000420092	0.00445451	H1f3
ENSMUSG00000020620	0.13	0.13	0.1	0.31	0.3	0.23	0.12	0.28	1.22239	0.000426558	0.00450664	Abca8b
ENSMUSG00000039646	5.25	5.61	5.45	4.28	3.32	2.92	5.43667	3.50667	-0.632622	0.000427075	0.00450914	Vasn
ENSMUSG00000051149	3.65	3.82	2.83	2.61	1.47	2.03	3.43333	2.03667	-0.7534	0.000447111	0.00470213	Adnp
ENSMUSG00000050914	16.4	15.28	16.45	5.38	10.16	11.52	16.0433	9.02	-0.830775	0.000453063	0.0047399	Ankrd37
ENSMUSG00000040606	0.54	0.71	0.64	2.06	0.92	1.38	0.63	1.45333	1.20594	0.000472256	0.00490872	Kazn
ENSMUSG00000020017	0.9	1.42	1.12	0.43	0.65	0.68	1.14667	0.586667	-0.966833	0.000479533	0.00497148	Hal
ENSMUSG00000027347	11.02	12.07	11.59	3	6.27	5.95	11.56	5.07333	-1.18814	0.00048151	0.0049872	Rasgrp1
ENSMUSG00000032311	2.75	2.68	1.99	3.81	4.28	3.6	2.47333	3.89667	0.655784	0.00048167	0.0049872	Nrg4
ENSMUSG00000021765	3.15	2.85	3.07	3.61	5.19	5.7	3.02333	4.83333	0.676878	0.000491913	0.00507937	Fst
ENSMUSG00000039116	2.29	2.49	2.34	1.68	1.54	1.52	2.37333	1.58	-0.58699	0.000494555	0.00509433	Adgrg6
ENSMUSG00000022671	5.01	5.16	5.99	8.68	9.42	6.87	5.38667	8.32333	0.627769	0.000497149	0.00511776	Mzt2
ENSMUSG00000032418	0.64	0.72	0.67	1.18	1.06	1.53	0.676667	1.25667	0.893085	0.000502063	0.00515513	Me1
ENSMUSG00000039629	1.38	1.11	1.17	0.74	0.68	0.59	1.22	0.67	-0.864648	0.000523614	0.00534906	Strip2
ENSMUSG00000067341	0.82	0.68	0.63	0.27	0.3	0.27	0.71	0.28	-1.34239	0.000531571	0.00539602	H2-Eb2
ENSMUSG00000037913	7.84	8.22	7.19	19.34	9.44	9.33	7.75	12.7033	0.712939	0.000549351	0.00553452	Tmem156
ENSMUSG00000052632	3.72	3.59	3.26	2	2.09	2.69	3.52333	2.26	-0.640618	0.0005895	0.00589831	Asap2
ENSMUSG00000021070	0.02	0.08	0.03	0.64	0.15	0.1	0.0433333	0.296667	2.77529	0.000602226	0.00599204	Bdkrb2
ENSMUSG00000018906	1.56	0.96	0.64	0.05	0.32	0.37	1.05333	0.246667	-2.09433	0.000621321	0.00615533	P4ha2
ENSMUSG00000021886	11.08	9.76	11.8	4.93	7.86	8.08	10.88	6.95667	-0.64521	0.000653499	0.00643837	Gpr65
ENSMUSG00000054517	2.72	2.82	2.95	1.53	2.03	1.72	2.83	1.76	-0.685227	0.000671845	0.00659484	Trim65
ENSMUSG00000004110	0.22	0.13	0.22	0.07	0.09	0.06	0.19	0.0733333	-1.37346	0.000685696	0.00670621	Cacna1e
ENSMUSG00000067586	1.41	1.1	1.34	2.91	1.64	1.81	1.28333	2.12	0.724168	0.000712431	0.00691712	S1pr3
ENSMUSG00000099398	0.16	0.12	0.14	0.5	0.3	0.4	0.14	0.4	1.51457	0.000721153	0.00698913	Ms4a14
ENSMUSG00000039911	0.88	0.78	0.47	1.64	1	1.8	0.71	1.48	1.05971	0.000724277	0.00701518	Spsb1
ENSMUSG00000046881	1.87	1.57	1.64	1.31	0.93	1.07	1.69333	1.10333	-0.617997	0.000754456	0.0072463	Olfr374
ENSMUSG00000021950	1	0.5	1.02	0.04	0.31	0.21	0.84	0.186667	-2.16993	0.000767141	0.00735765	Anxa8
ENSMUSG00000097239	0.94	0.29	0.69	1.8	1.15	1.87	0.64	1.60667	1.32793	0.000769093	0.00736486	Gm27029
ENSMUSG00000075590	0.37	0.26	0.5	0.07	0.05	0.07	0.376667	0.0633333	-2.57225	0.000781082	0.00746029	Nrbp2
ENSMUSG00000030108	5.57	3.95	5.07	9.77	6.07	6.32	4.86333	7.38667	0.602978	0.000790329	0.00752781	Slc6a13
ENSMUSG00000037138	0.79	1.21	0.62	0.4	0.35	0.37	0.873333	0.373333	-1.22607	0.00081921	0.00777064	Aff3
ENSMUSG00000029810	8.82	10.71	7.35	5.97	5.58	4.86	8.96	5.47	-0.711958	0.000840632	0.00793634	Tmem176b
ENSMUSG00000047496	0.31	0.34	0.22	0.13	0.12	0.1	0.29	0.116667	-1.31366	0.000854286	0.0080605	Rnf152
ENSMUSG00000031780	594.31	512.43	544.38	258.35	379.07	388.85	550.373	342.09	-0.686035	0.000896711	0.00839752	Ccl17
ENSMUSG00000008845	0.23	0.23	0.16	0.01	0.06	0.04	0.206667	0.0366667	-2.49476	0.000896802	0.00839752	Cd163
ENSMUSG00000038205	2.04	1.99	1.98	1.22	1.49	1.21	2.00333	1.30667	-0.616511	0.000901109	0.00843293	Prkab2
ENSMUSG00000026409	4.52	4.34	3.99	2.47	2.95	2.37	4.28333	2.59667	-0.722073	0.00094337	0.00876711	Pfkfb2
ENSMUSG00000070868	0.58	0.36	0.37	0.07	0.14	0.17	0.436667	0.126667	-1.7855	0.000951266	0.00883538	Skint3
ENSMUSG00000039542	1.03	0.96	0.92	0.56	0.37	0.78	0.97	0.57	-0.767023	0.000975713	0.00903111	Ncam1
ENSMUSG00000001700	1.84	1.87	1.99	4.51	2.7	2.36	1.9	3.19	0.747557	0.000985981	0.00909992	Gramd3
ENSMUSG00000032402	2.27	2.05	1.88	1.19	1	0.77	2.06667	0.986667	-1.06667	0.000994658	0.00914674	Smad3
ENSMUSG00000062382	3.74	2.7	3.7	5.86	5.07	5.88	3.38	5.60333	0.729262	0.00100524	0.00922469	Ftl1-ps1
ENSMUSG00000030465	1.19	1.08	0.79	0.33	0.77	0.62	1.02	0.573333	-0.831123	0.00101037	0.00926115	Psd3
ENSMUSG00000032878	1.03	1.14	1.22	0.47	0.52	0.59	1.13	0.526667	-1.10136	0.00111214	0.0100506	Ccdc85a
ENSMUSG00000047793	0.51	0.42	0.39	0.22	0.26	0.19	0.44	0.223333	-0.978305	0.00115872	0.0104129	Sned1
ENSMUSG00000039693	2.02	2.39	2.83	3.42	4.29	3.71	2.41333	3.80667	0.657501	0.00118945	0.0106296	Msantd3
ENSMUSG00000055675	0.38	0.47	0.32	0.06	0.23	0.16	0.39	0.15	-1.37851	0.00119806	0.0107006	Kbtbd11
ENSMUSG00000006800	11.66	12.46	10.44	5.55	7.76	8.46	11.52	7.25667	-0.666762	0.00123264	0.0109546	Sulf2
ENSMUSG00000037347	0.93	1.49	0.65	0.18	0.52	0.31	1.02333	0.336667	-1.60388	0.00124152	0.0110213	Chst7
ENSMUSG00000078795	0.31	0.49	0.65	1.41	0.97	1.46	0.483333	1.28	1.40505	0.00125749	0.0111262	Ceacam15
ENSMUSG00000033170	1.03	0.88	0.93	0.59	0.56	0.43	0.946667	0.526667	-0.845966	0.00127688	0.0112667	Card10
ENSMUSG00000026807	3.2	3.16	2.82	1.61	1.8	1.73	3.06	1.71333	-0.836726	0.00131995	0.0115894	Ak8
ENSMUSG00000063564	0.44	0.48	0.41	0.91	0.67	0.7	0.443333	0.76	0.777608	0.00133288	0.0116774	Col23a1
ENSMUSG00000059742	1.02	0.86	0.94	0.71	0.51	0.63	0.94	0.616667	-0.60817	0.0013797	0.0120177	Kcnh7
ENSMUSG00000040276	0.78	0.61	0.85	0.29	0.27	0.17	0.746667	0.243333	-1.61753	0.00143746	0.0124042	Pacsin1
ENSMUSG00000031385	0.39	0.31	0.38	0.67	0.65	0.57	0.36	0.63	0.807355	0.0014717	0.0126589	Plxnb3
ENSMUSG00000057530	11.07	37.03	10.29	8.03	7.89	8.4	19.4633	8.10667	-1.26358	0.00147862	0.0127115	Ece1
ENSMUSG00000024610	968.03	950.34	925.72	758.28	522.58	523.11	948.03	601.323	-0.656792	0.00148086	0.012724	Cd74
ENSMUSG00000016756	1.21	0.97	1.13	0.44	0.66	0.9	1.10333	0.666667	-0.726831	0.00149747	0.0128461	Cmah
ENSMUSG00000028555	2.02	1.95	1.76	2.3	3.83	3.57	1.91	3.23333	0.75945	0.00149948	0.0128565	Ttc39a
ENSMUSG00000024186	1.59	1.34	1.66	0.59	0.96	0.59	1.53	0.713333	-1.10088	0.00150922	0.0129261	Rgs11
ENSMUSG00000005800	410.95	409.55	418.77	1181.61	613.85	642.44	413.09	812.633	0.976148	0.00153214	0.0130736	Mmp8
ENSMUSG00000037995	0.67	1.15	1.06	0.79	0.57	0.22	0.96	0.526667	-0.866144	0.00154726	0.0131887	Igsf9
ENSMUSG00000035678	7.21	7.33	7.63	4.59	5.03	5.12	7.39	4.91333	-0.588872	0.00161493	0.0136568	Tnfsf9
ENSMUSG00000000627	1.26	0.96	0.99	0.39	0.58	0.65	1.07	0.54	-0.986579	0.00162805	0.0137521	Sema4f
ENSMUSG00000026797	1.48	1.47	1.67	3.28	1.95	2	1.54	2.41	0.646103	0.001644	0.0138669	Stxbp1
ENSMUSG00000016918	0.28	0.01	0.01	0	0	0	0.1	0.001	-6.64386	0.00167429	0.0140404	Sulf1
ENSMUSG00000032558	1.79	1.27	1.15	0.74	0.74	0.93	1.40333	0.803333	-0.804787	0.00171181	0.0143103	Nphp3
ENSMUSG00000031379	1.57	1.11	1.77	2.59	2.77	2.62	1.48333	2.66	0.842583	0.00175611	0.014597	Pir
ENSMUSG00000021680	0.12	0.26	0.35	0.69	0.72	0.79	0.243333	0.733333	1.59154	0.00186592	0.0153273	Crhbp
ENSMUSG00000008734	0.1	0.08	0.25	0.44	0.26	0.25	0.143333	0.316667	1.14359	0.00189982	0.0155295	Gprc5b
ENSMUSG00000039781	3.2	3.2	3.28	2.36	1.69	2.35	3.22667	2.13333	-0.596935	0.0019703	0.0159803	Cep131
ENSMUSG00000044313	0.94	0.81	0.86	0.42	0.34	0.52	0.87	0.426667	-1.02791	0.00198889	0.0161067	Mab21l3
ENSMUSG00000024371	0	0.03	0	0.16	0.21	0.2	0.01	0.19	4.24793	0.00200609	0.0162133	C2
ENSMUSG00000036882	1.06	1.78	1.38	0.92	0.67	0.59	1.40667	0.726667	-0.952915	0.00204647	0.0164898	Arhgap33
ENSMUSG00000050621	1.54	0.37	0.72	0	0	0	0.876667	0.001	-9.77588	0.00211729	0.0170008	Rps27rt
ENSMUSG00000079491	1.45	0.78	1.29	2.19	2.39	1.94	1.17333	2.17333	0.889297	0.00212503	0.0170544	H2-T10
ENSMUSG00000039774	1.41	2.06	2.13	0.91	0.84	1.11	1.86667	0.953333	-0.969412	0.00214103	0.0171742	Galnt12
ENSMUSG00000049103	311.37	304.33	306.5	130.17	217.12	208.98	307.4	185.423	-0.729294	0.00215183	0.0172351	Ccr2
ENSMUSG00000078137	1.03	1.16	0.97	2.62	1.23	1.44	1.05333	1.76333	0.743343	0.00216874	0.0173618	Ankrd63
ENSMUSG00000030742	2.74	3.91	2.4	6.59	3.28	5.47	3.01667	5.11333	0.761309	0.00228649	0.0181259	Lat
ENSMUSG00000028128	10.85	8.11	9.18	3.58	5.36	7.91	9.38	5.61667	-0.739874	0.00236168	0.0185913	F3
ENSMUSG00000026228	0.08	0.09	0.14	0.69	0.37	0.35	0.103333	0.47	2.18536	0.00237792	0.0186893	Htr2b
ENSMUSG00000020473	0.54	0.02	0.01	0.02	0	0	0.19	0.00666667	-4.83289	0.00241659	0.01894	Aebp1
ENSMUSG00000093803	7.46	6.77	6.34	4.72	3.62	3.88	6.85667	4.07333	-0.751298	0.00242278	0.0189793	Ppp2r3d
ENSMUSG00000047246	0.16	0.1	0.19	0.38	0.48	0.53	0.15	0.463333	1.62709	0.00245786	0.0191917	H2bc6
ENSMUSG00000016496	46.09	44.15	48.08	95.53	60.8	60.45	46.1067	72.26	0.648222	0.00246812	0.0192126	Cd274
ENSMUSG00000025856	4.99	5.02	5.25	21.24	7.56	9.61	5.08667	12.8033	1.33173	0.00248111	0.019295	Pdgfa
ENSMUSG00000031983	3.96	4.15	3.86	1.95	3.21	2.75	3.99	2.63667	-0.597674	0.00253967	0.0196837	2310022B05Rik
ENSMUSG00000029762	2.83	3.57	3.33	4.36	4.59	5.66	3.24333	4.87	0.586444	0.00267905	0.0205654	Akr1b8
ENSMUSG00000024770	0.84	1.41	1.62	1.12	3.84	3.99	1.29	2.98333	1.20955	0.00268474	0.0205993	Lipn
ENSMUSG00000004698	0.68	0.7	1.01	0.26	0.46	0.4	0.796667	0.373333	-1.09351	0.00272138	0.0208307	Hdac9
ENSMUSG00000031274	0.15	0.13	0.06	0.01	0.02	0.03	0.113333	0.02	-2.5025	0.00276038	0.0210589	Col4a5
ENSMUSG00000047878	0.31	0.47	0.55	2.99	0.65	0.66	0.443333	1.43333	1.69291	0.00276891	0.0211139	A4galt
ENSMUSG00000045667	0.35	0.25	0.31	0.03	0.07	0.11	0.303333	0.07	-2.11548	0.00278684	0.0212204	Smtnl2
ENSMUSG00000070047	0.25	0.03	0.02	0.02	0	0.02	0.1	0.0133333	-2.90689	0.00292115	0.0220446	Fat1
ENSMUSG00000043439	1.94	1.91	2.3	1.43	1.03	0.93	2.05	1.13	-0.859301	0.00294234	0.022142	Epop
ENSMUSG00000037989	0.23	0.31	0.19	1.54	0.38	0.36	0.243333	0.76	1.64307	0.002946	0.0221487	Wnk2
ENSMUSG00000026090	0.38	0.58	0.33	0.03	0.19	0.21	0.43	0.143333	-1.58496	0.00295789	0.0221966	Cracdl
ENSMUSG00000044337	0.19	0.08	0.16	0	0.02	0	0.143333	0.00666667	-4.42626	0.00299054	0.0223789	Ackr3
ENSMUSG00000030409	0.55	1.26	0.82	0.37	0.2	0.19	0.876667	0.253333	-1.79099	0.00299748	0.0223917	Dmpk
ENSMUSG00000029299	1.91	2.06	2.08	0.58	1.48	1.11	2.01667	1.05667	-0.932452	0.00303743	0.0226348	Abcg3
ENSMUSG00000024727	0.23	0.29	0.2	0.53	0.54	0.51	0.24	0.526667	1.13386	0.00326315	0.0240601	Trpm6
ENSMUSG00000028680	10.76	13.23	12.65	29.44	17.78	16.42	12.2133	21.2133	0.796514	0.00328385	0.0241683	Plk3
ENSMUSG00000051043	1.54	1.71	1.91	0.68	1.03	1.13	1.72	0.946667	-0.86148	0.00329209	0.0242179	Gprc5c
ENSMUSG00000070803	0.63	0.43	0.84	1.95	1.18	1.31	0.633333	1.48	1.22456	0.00341622	0.0249709	Cited4
ENSMUSG00000031138	0.86	0.95	0.75	1.34	1.25	1.71	0.853333	1.43333	0.748193	0.00344608	0.0251548	F9
ENSMUSG00000102222	0.13	0.02	0.05	0	0	0	0.0666667	0.001	-6.05889	0.00345249	0.0251795	Pcdhga10
ENSMUSG00000063060	0.03	0.03	0	0.21	0.16	0.1	0.02	0.156667	2.96963	0.00359419	0.0259529	Sox7
ENSMUSG00000026581	70.93	74.3	68.86	32.52	52.17	51.44	71.3633	45.3767	-0.653232	0.00371815	0.0266959	Sell
ENSMUSG00000079654	0.09	0.23	0.14	0	0.02	0.02	0.153333	0.0133333	-3.52356	0.0037274	0.0267463	Prrt4
ENSMUSG00000040265	0	0	0	0.06	0.03	0.07	0.001	0.0533333	5.73697	0.00378017	0.0270887	Dnm3
ENSMUSG00000002100	0.53	0.63	0.59	0.24	0.3	0.29	0.583333	0.276667	-1.07617	0.00384029	0.0274338	Mybpc3
ENSMUSG00000092470	0.06	0.04	0.14	0	0	0	0.08	0.001	-6.32193	0.00384697	0.0274693	Gm20518
ENSMUSG00000026014	6.89	6.21	7.49	5.36	3.45	3.79	6.86333	4.2	-0.70852	0.00403253	0.028528	Raph1
ENSMUSG00000036186	2.21	1.78	2.35	3.76	2.81	3.17	2.11333	3.24667	0.619439	0.00423597	0.0296628	Dipk1b
ENSMUSG00000044072	0.69	0.82	0.62	0.29	0.29	0.58	0.71	0.386667	-0.876729	0.00430189	0.0300365	Eml6
ENSMUSG00000038884	1.02	0.61	1.01	1.71	1.66	1.58	0.88	1.65	0.906891	0.00431125	0.0300888	Shfl
ENSMUSG00000034855	4.87	2.81	5.31	7.34	6.29	6.45	4.33	6.69333	0.628358	0.0043302	0.030189	Cxcl10
ENSMUSG00000039145	6.49	7.34	6.67	1.55	3.65	3.49	6.83333	2.89667	-1.2382	0.00434095	0.0302304	Camk1d
ENSMUSG00000003534	0.45	0.33	0.26	0.3	0.1	0.09	0.346667	0.163333	-1.08573	0.00434556	0.0302363	Ddr1
ENSMUSG00000111410	0.1	0.18	0.28	0	0	0	0.186667	0.001	-7.54432	0.00441147	0.0305888	Gm49337
ENSMUSG00000025964	1.01	1.11	0.9	0.62	0.39	0.66	1.00667	0.556667	-0.8547	0.00452173	0.0312164	Adam23
ENSMUSG00000022483	0.33	0.01	0.01	0.01	0	0	0.116667	0.00333333	-5.12928	0.00462024	0.0318167	Col2a1
ENSMUSG00000028943	0.21	0.19	0.19	0.1	0.03	0.03	0.196667	0.0533333	-1.88264	0.00469338	0.0322374	Espn
ENSMUSG00000062310	0.8	0.93	1.22	2.47	1.51	1.39	0.983333	1.79	0.864207	0.00473007	0.0324616	Glrp1
ENSMUSG00000031292	1.65	1.99	1.67	1.02	1.1	1.27	1.77	1.13	-0.647427	0.00485468	0.0331468	Cdkl5
ENSMUSG00000028542	0.6	0.62	0.45	1.51	0.96	0.74	0.556667	1.07	0.942725	0.00489907	0.0333931	Slc6a9
ENSMUSG00000039217	3.53	2.4	3.37	3.9	5.32	6.71	3.1	5.31	0.776444	0.00491958	0.0334976	Il18
ENSMUSG00000009731	0.4	0.34	0.3	0.18	0.11	0.14	0.346667	0.143333	-1.27417	0.00507669	0.0343849	Kcnd1
ENSMUSG00000009628	0.32	0.44	0.52	0.37	0.16	0.15	0.426667	0.226667	-0.912537	0.00515765	0.0348157	Tex15
ENSMUSG00000061603	0.11	0.12	0.15	0.42	0.12	0.15	0.126667	0.23	0.860597	0.00517246	0.0348864	Akap6
ENSMUSG00000076937	0.14	0.32	0.08	2.3	1.06	0.19	0.18	1.18333	2.71679	0.00529141	0.0355394	Iglc2
ENSMUSG00000040584	0.04	0.04	0.02	0.3	0.07	0.11	0.0333333	0.16	2.26303	0.00535658	0.0359192	Abcb1a
ENSMUSG00000042607	2.78	2.98	3.15	0.97	2.2	2.03	2.97	1.73333	-0.776914	0.00553015	0.0368767	Asb4
ENSMUSG00000031445	1.61	1.4	1.78	0.8	0.98	1.13	1.59667	0.97	-0.719007	0.00555756	0.0369843	Proz
ENSMUSG00000039976	0.99	1.06	0.95	0.69	0.56	0.49	1	0.58	-0.785875	0.00559517	0.0371446	Tbc1d16
ENSMUSG00000040929	0.89	0.98	1.07	0.68	0.62	0.64	0.98	0.646667	-0.59976	0.00571586	0.0378052	Rfx3
ENSMUSG00000072494	2.91	3.22	3.66	1.9	1.91	2.35	3.26333	2.05333	-0.668379	0.00577799	0.038169	Ppp1r3e
ENSMUSG00000029381	0.03	0.02	0.06	0.28	0.06	0.11	0.0366667	0.15	2.03242	0.00582588	0.0384221	Shroom3
ENSMUSG00000034413	0.56	0.55	0.63	0.38	0.31	0.27	0.58	0.32	-0.857981	0.00586734	0.0386163	Neurl1b
ENSMUSG00000032281	1.41	2.18	1.5	1.03	0.85	1.04	1.69667	0.973333	-0.801697	0.00587274	0.038636	Acsbg1
ENSMUSG00000027939	0.66	0.6	0.58	0.29	0.29	0.42	0.613333	0.333333	-0.879706	0.00600158	0.0393064	Nup210l
ENSMUSG00000025321	0.01	0.01	0.01	0.11	0.02	0.05	0.01	0.06	2.58496	0.00605091	0.039527	Itgb8
ENSMUSG00000053030	4.15	4.58	5.58	4.77	10.08	9.95	4.77	8.26667	0.793316	0.00605248	0.039527	Spink2
ENSMUSG00000025912	2.17	1.76	2.31	1.36	1.62	1.16	2.08	1.38	-0.591915	0.00606068	0.0395484	Mybl1
ENSMUSG00000024304	0.22	0.05	0.13	0.02	0	0.01	0.133333	0.01	-3.73697	0.00607398	0.0396029	Cdh2
ENSMUSG00000029102	2.77	2.35	2.83	12.37	4.39	3.91	2.65	6.89	1.37851	0.00610775	0.0397404	Hgfac
ENSMUSG00000046593	1.51	1.7	1.54	1.72	3.3	2.5	1.58333	2.50667	0.662805	0.0061914	0.0402053	Tmem215
ENSMUSG00000053963	0.09	0.2	0.06	0.71	0.11	0.31	0.116667	0.376667	1.6909	0.00625473	0.0405674	Stum
ENSMUSG00000109378	2.75	2.6	2.96	2.09	1.63	1.72	2.77	1.81333	-0.611242	0.00633962	0.0410013	Gm49396
ENSMUSG00000093485	0	0	0	0.24	0	0.23	0.001	0.156667	7.29155	0.00634206	0.0410013	Gm20708
ENSMUSG00000051855	0.38	0.16	0.15	0.02	0.13	0.02	0.23	0.0566667	-2.02106	0.00634875	0.041028	Mest
ENSMUSG00000017314	0.14	0.08	0.12	0.91	0.16	0.14	0.113333	0.403333	1.8314	0.00642108	0.0413789	Mpp2
ENSMUSG00000078532	0.85	1.23	1.07	1.98	1.89	2.01	1.05	1.96	0.900464	0.00650422	0.0417907	Nkain1
ENSMUSG00000062661	1.12	1.1	1.04	0.44	0.72	0.76	1.08667	0.64	-0.763766	0.00652722	0.0418641	Ncs1
ENSMUSG00000037161	2.27	2.28	2.05	0.38	1.18	1.38	2.2	0.98	-1.16665	0.00654911	0.0419681	Mgarp
ENSMUSG00000024044	2.37	2.33	2.04	1.73	0.76	0.91	2.24667	1.13333	-0.987214	0.00656773	0.0420371	Epb41l3
ENSMUSG00000032092	0.01	0	0.05	2.94	0.12	0.02	0.02	1.02667	5.68182	0.00665558	0.0425316	Mpzl2
ENSMUSG00000072437	2.61	2.18	2.23	1.09	1.62	1.84	2.34	1.51667	-0.625604	0.00669689	0.0427446	Nanos1
ENSMUSG00000048965	0.73	0.6	0.62	0.98	1.03	1.07	0.65	1.02667	0.659456	0.00670912	0.0427887	Mrgpre
ENSMUSG00000037185	1.6	1.66	1.56	0.91	1.01	0.98	1.60667	0.966667	-0.73298	0.00689321	0.0437788	Krt80
ENSMUSG00000028179	0.51	0.46	0.5	2.45	0.67	0.62	0.49	1.24667	1.34722	0.00691648	0.0438499	Cth
ENSMUSG00000035299	1.96	1.51	1.44	0.81	1.15	0.96	1.63667	0.973333	-0.749755	0.00708381	0.0447165	Mid1
ENSMUSG00000096463	3.3	2.83	2.22	1.3	1.9	1.59	2.78333	1.59667	-0.801751	0.00709608	0.0447588	Gm21750
ENSMUSG00000032028	2.31	1.92	4.2	2.98	5.11	4.58	2.81	4.22333	0.587812	0.00722658	0.0453008	Nxpe2
ENSMUSG00000021186	0.5	0.04	0.02	0	0.03	0	0.186667	0.01	-4.22239	0.0072528	0.0453851	Fbln5
ENSMUSG00000036905	79.84	82.09	87.99	26.71	55.28	50.94	83.3067	44.31	-0.9108	0.00729546	0.0456044	C1qb
ENSMUSG00000022324	0.9	0.95	0.7	0.94	1.75	1.48	0.85	1.39	0.70955	0.00731941	0.0457185	Matn2
ENSMUSG00000034416	0.19	0.29	0.23	0.09	0.07	0.13	0.236667	0.0966667	-1.29177	0.0073407	0.0458159	Pkd1l2
ENSMUSG00000026837	1.83	1.05	1.37	2.84	1.85	1.95	1.41667	2.21333	0.64372	0.00746672	0.046422	Col5a1
ENSMUSG00000041757	2.34	2.01	2.15	1.25	1.77	1.27	2.16667	1.43	-0.599462	0.00748088	0.0464561	Plekha6
ENSMUSG00000026012	1.36	1.17	1.44	6.1	1.89	2.31	1.32333	3.43333	1.37543	0.00764504	0.0473384	Cd28
ENSMUSG00000020160	1.26	1.3	1.19	0.69	0.75	0.77	1.25	0.736667	-0.762844	0.00775867	0.0478665	Meis1
ENSMUSG00000091811	2.18	2.11	1.96	1.36	1	1.09	2.08333	1.15	-0.85726	0.00778615	0.0480176	Inafm1
ENSMUSG00000024140	0.33	0.35	0.35	0.13	0.13	0.2	0.343333	0.153333	-1.16294	0.00780648	0.048106	Epas1
ENSMUSG00000028417	0.41	0.43	0.51	1.16	0.65	0.72	0.45	0.843333	0.906178	0.00783301	0.0482223	Tal2
ENSMUSG00000044788	0.93	0.71	0.9	0.52	0.6	0.32	0.846667	0.48	-0.81876	0.00795646	0.0487682	Fads6
ENSMUSG00000018486	0	0	0	0.07	0.07	0.01	0.001	0.05	5.64386	0.00810435	0.049467	Wnt9b
ENSMUSG00000025934	0.15	0.27	0.24	1.15	0.87	0.23	0.22	0.75	1.76939	0.00811517	0.0495142	Gsta3
ENSMUSG00000019539	0.69	0.47	1.14	1.48	1.89	0.81	0.766667	1.39333	0.861869	0.0081475	0.0496926	Rcn3
ENSMUSG00000098488	0.26	0.47	0.54	0.21	0	0.12	0.423333	0.11	-1.94429	0.00818463	0.0498434	Pla2g4b
ENSMUSG00000037225	0.38	0.38	0.33	0.19	0.15	0.16	0.363333	0.166667	-1.12433	0.00834972	0.0506375	Fgf2
ENSMUSG00000064220	5	5.5	4.34	4.47	9.88	11.86	4.94667	8.73667	0.820626	0.00837982	0.0507817	H2ac18
ENSMUSG00000057132	0.15	0.21	0.3	0.57	0.34	0.71	0.22	0.54	1.29546	0.00838856	0.0508042	Rpgrip1
ENSMUSG00000020053	5.02	7.32	6.05	7.78	14.39	13.29	6.13	11.82	0.947271	0.00841999	0.0509675	Igf1
ENSMUSG00000024600	0.02	0.02	0.02	0.12	0.13	0.23	0.02	0.16	3	0.00844934	0.0510874	Slc27a6
ENSMUSG00000032271	0.74	1.13	0.88	1.03	3	2.3	0.916667	2.11	1.20277	0.00846225	0.0511461	Nnmt
ENSMUSG00000056671	10.67	8.69	9.08	4.32	6.74	7.33	9.48	6.13	-0.629	0.00847271	0.0511901	Prelid2
ENSMUSG00000020900	0.29	0.08	0.06	0.03	0.03	0.05	0.143333	0.0366667	-1.96683	0.00847724	0.0511982	Myh10
ENSMUSG00000053617	0.66	0.68	0.7	0.5	0.27	0.31	0.68	0.36	-0.917538	0.00852125	0.0514253	Sh3pxd2a
ENSMUSG00000118671	0.02	0.01	0.03	0.08	0.06	0.06	0.02	0.0666667	1.73697	0.00857687	0.0517027	EPPK1
ENSMUSG00000034258	0.09	0.06	0.07	0.32	0.21	0.18	0.0733333	0.236667	1.69032	0.0086933	0.0523064	Flvcr2
ENSMUSG00000050855	0.29	0.22	0.28	0.51	0.59	0.59	0.263333	0.563333	1.0971	0.00877417	0.0526549	Zfp940
ENSMUSG00000071398	0.19	0.3	0.17	0.55	0.67	0.83	0.22	0.683333	1.63509	0.00885168	0.0530095	2410004P03Rik
ENSMUSG00000041845	0.98	0.95	0.9	2.01	1.32	1.7	0.943333	1.67667	0.829756	0.00885944	0.0530095	Rhod
ENSMUSG00000090626	1.24	1.09	1.22	2.1	2.19	1.23	1.18333	1.84	0.636849	0.00889436	0.0531213	Tex9
ENSMUSG00000025586	0.95	0.88	0.97	1.01	1.67	1.61	0.933333	1.43	0.615551	0.00896936	0.0535063	Cpeb1
ENSMUSG00000059588	16.45	15.72	16.54	6.61	11.71	11.14	16.2367	9.82	-0.725461	0.00905405	0.0539314	Calcrl
ENSMUSG00000050395	8.96	6.96	8.05	3.09	5.29	5.42	7.99	4.6	-0.796562	0.00912223	0.0542972	Tnfsf15
ENSMUSG00000053965	0.44	0.55	0.6	0.29	0.3	0.32	0.53	0.303333	-0.805088	0.00927685	0.0549933	Pde5a
ENSMUSG00000055745	0.49	0.68	0.46	0.3	0.23	0.28	0.543333	0.27	-1.00888	0.00942944	0.0557333	Rtl6
ENSMUSG00000048826	0	0.03	0.01	0.21	0.1	0.19	0.0133333	0.166667	3.64386	0.00948945	0.0560246	Dact2
ENSMUSG00000022219	0.52	0.86	0.74	1.51	1.54	1.27	0.706667	1.44	1.02697	0.00952337	0.0561607	Cideb
ENSMUSG00000028862	1.32	1.53	1.06	0.79	0.87	0.81	1.30333	0.823333	-0.662658	0.00957743	0.0563385	Map3k6
ENSMUSG00000034265	2.88	2.47	2.43	2.15	1.42	1.49	2.59333	1.68667	-0.620633	0.00971608	0.0569871	Zdhhc14
ENSMUSG00000040703	0.35	0.2	0.21	0.07	0.07	0.02	0.253333	0.0533333	-2.24793	0.00976764	0.0572063	Cyp2s1
ENSMUSG00000004098	0.01	0.02	0.02	0.14	0.08	0.05	0.0166667	0.09	2.43296	0.00977127	0.0572063	Col5a3
ENSMUSG00000074743	0.73	0.63	0.65	0.69	1.31	1.38	0.67	1.12667	0.749828	0.00985304	0.057643	Thbd
ENSMUSG00000072964	0.87	0.83	0.72	1.75	1.24	1.02	0.806667	1.33667	0.728595	0.00986389	0.0576644	Bhlhb9
ENSMUSG00000071537	0.93	1.42	1.54	0.57	0.72	0.57	1.29667	0.62	-1.06447	0.00988285	0.0576913	Klrg2
ENSMUSG00000042851	0.56	0.96	0.74	1.65	1.01	0.92	0.753333	1.19333	0.663637	0.00999712	0.0581527	Zc3h6
ENSMUSG00000027200	3.85	3.9	3.55	2.88	1.24	1.54	3.76667	1.88667	-0.997449	0.0101178	0.0587637	Sema6d
ENSMUSG00000044674	0.76	0.98	0.74	0.33	0.57	0.48	0.826667	0.46	-0.845672	0.0105218	0.0606116	Fzd1
ENSMUSG00000031129	1.36	1.33	1.51	0.5	0.93	1.03	1.4	0.82	-0.771731	0.0106683	0.061252	Slc9a9
ENSMUSG00000051790	0.34	0.39	0.43	0.8	0.62	0.53	0.386667	0.65	0.749349	0.0108253	0.061932	Nlgn2
ENSMUSG00000040350	1.35	1.48	0.99	0.8	0.45	0.48	1.27333	0.576667	-1.1428	0.0109088	0.0623207	Trim7
ENSMUSG00000037681	1.09	1.13	1.12	0.56	0.66	0.79	1.11333	0.67	-0.732653	0.0111211	0.0633084	Esyt3
ENSMUSG00000020654	0.52	0.3	0.53	0.48	0.91	1.09	0.45	0.826667	0.877381	0.0113887	0.0645121	Adcy3
ENSMUSG00000033768	0.04	0.04	0.03	0.25	0.36	0.15	0.0366667	0.253333	2.7885	0.0114842	0.064961	Nrxn2
ENSMUSG00000039607	0.13	0.08	0.16	0.05	0.06	0.01	0.123333	0.04	-1.62449	0.0116183	0.0655348	Rbms3
ENSMUSG00000032531	1.67	1.5	1.47	3.24	2	1.85	1.54667	2.36333	0.611661	0.0117437	0.0661495	Amotl2
ENSMUSG00000025650	0.2	0.17	0.12	0.06	0.03	0.1	0.163333	0.0633333	-1.36678	0.01193	0.0670813	Col7a1
ENSMUSG00000004565	4.72	5.8	11.2	3.99	5.57	3.88	7.24	4.48	-0.692491	0.0119979	0.0674155	Pnpla6
ENSMUSG00000026700	8.06	7.31	8.06	3.07	6.45	5.89	7.81	5.13667	-0.60449	0.0121205	0.0679857	Tnfsf4
ENSMUSG00000034460	0.05	0.07	0.07	0.24	0.14	0.11	0.0633333	0.163333	1.36678	0.0121419	0.0680818	Six4
ENSMUSG00000068874	26.22	21.21	24.82	9.31	16.44	16.86	24.0833	14.2033	-0.761806	0.012692	0.0706038	Selenbp1
ENSMUSG00000117338	0	0	0	0.54	0	0.28	0.001	0.273333	8.09452	0.0129229	0.0716603	Gm49804
ENSMUSG00000067878	0.27	0.2	0.23	0.39	0.51	0.61	0.233333	0.503333	1.10912	0.0130524	0.0722787	Map7d3
ENSMUSG00000090942	0.36	0.22	0.26	0.49	0.55	0.6	0.28	0.546667	0.965235	0.0132762	0.0732788	F830016B08Rik
ENSMUSG00000032530	0.1	0	0.06	0.99	0.3	0.12	0.0533333	0.47	3.13955	0.0132877	0.0732788	Lyzl4
ENSMUSG00000006567	0.12	0.09	0.13	0.03	0.03	0.05	0.113333	0.0366667	-1.62803	0.0134399	0.0738644	Atp7b
ENSMUSG00000048442	2.59	2	2.5	1.55	1.31	0.91	2.36333	1.25667	-0.911221	0.0137338	0.0751967	Smim5
ENSMUSG00000002475	0.49	0.21	0.39	0.44	0.92	0.72	0.363333	0.693333	0.932255	0.0137449	0.0752315	Abhd3
ENSMUSG00000096458	1.66	1.56	1.74	2.77	1.87	3.43	1.65333	2.69	0.702229	0.0139165	0.0760929	Moap1
ENSMUSG00000037754	0.88	0.81	0.7	0.39	0.65	0.47	0.796667	0.503333	-0.662462	0.014178	0.0770856	Ppp1r16b
ENSMUSG00000043807	0.97	0.82	1.04	0.42	0.29	0.32	0.943333	0.343333	-1.45816	0.0142985	0.0776007	Ly6g5b
ENSMUSG00000050295	0.08	0.03	0.05	0.01	0	0	0.0533333	0.00333333	-4	0.0144674	0.0782787	Foxc1
ENSMUSG00000054932	0.51	0.74	0.53	1.18	1.18	0.82	0.593333	1.06	0.83715	0.0145427	0.0785538	Afp
ENSMUSG00000029061	0.43	0.44	0.33	0.15	0.04	0.04	0.4	0.0766667	-2.38333	0.0147225	0.0792056	Mmp23
ENSMUSG00000037482	0.01	0.01	0	0.13	0.06	0.1	0.00666667	0.0966667	3.85798	0.0148015	0.0795775	Erv3
ENSMUSG00000061410	0.21	0.24	0.21	0.04	0.08	0.12	0.22	0.08	-1.45943	0.0148183	0.0796179	Zcchc14
ENSMUSG00000028464	0.5	0.34	0.25	0.04	0.25	0	0.363333	0.0966667	-1.9102	0.014819	0.0796179	Tpm2
ENSMUSG00000021007	0.83	1.05	1.05	1.56	1.8	1.31	0.976667	1.55667	0.672522	0.0148704	0.0798143	Spata7
ENSMUSG00000043051	1.1	0.95	0.78	0.44	0.72	0.39	0.943333	0.516667	-0.868534	0.0149521	0.0801455	Disc1
ENSMUSG00000074359	0.26	0.16	0.2	0.04	0.03	0.03	0.206667	0.0333333	-2.63227	0.0150396	0.0805068	Psg23
ENSMUSG00000001870	0.32	0.26	0.2	0.14	0.07	0.15	0.26	0.12	-1.11548	0.0154538	0.0823673	Ltbp1
ENSMUSG00000030680	4.36	0.45	1.28	0.11	0.14	0.84	2.03	0.363333	-2.48211	0.0154998	0.0825303	Pagr1a
ENSMUSG00000017718	1.54	1.6	1.94	1.02	1.3	0.89	1.69333	1.07	-0.662255	0.0157073	0.0834137	Afmid
ENSMUSG00000024669	0.63	0.53	0.58	1.36	0.98	0.9	0.58	1.08	0.896907	0.0158186	0.0838385	Cd5
ENSMUSG00000059430	0.25	0.4	0.29	0.12	0	0.08	0.313333	0.0666667	-2.23266	0.0159314	0.0842143	Actg2
ENSMUSG00000096229	1.99	1.19	1.52	1.09	0.6	0.56	1.56667	0.75	-1.06274	0.0159422	0.0842432	Olfr774
ENSMUSG00000026932	1.38	1.33	3.01	0.7	1.38	1.06	1.90667	1.04667	-0.865251	0.0160722	0.0847628	Nacc2
ENSMUSG00000059060	0.85	0.59	0.72	1.54	1.37	0.94	0.72	1.28333	0.833827	0.0161508	0.0851494	Rad51b
ENSMUSG00000021087	0.36	0.38	0.26	0.23	0.05	0.06	0.333333	0.113333	-1.55639	0.0163225	0.0858859	Rtn1
ENSMUSG00000028197	0.26	0.31	0.36	0.74	0.37	0.42	0.31	0.51	0.718229	0.0163855	0.0861323	Col24a1
ENSMUSG00000048142	0.67	0.83	0.61	0.47	0.39	0.46	0.703333	0.44	-0.676705	0.016523	0.0866849	Nat8l
ENSMUSG00000026009	0.08	0.09	0.09	0.31	0.28	0.16	0.0866667	0.25	1.52838	0.0166376	0.0871724	Icos
ENSMUSG00000027204	0.21	0.01	0.03	0.01	0.03	0.01	0.0833333	0.0166667	-2.32193	0.0168675	0.0881754	Fbn1
ENSMUSG00000045348	0.22	0.36	0.18	0.67	0.45	0.39	0.253333	0.503333	0.990477	0.017041	0.0888799	Nyap1
ENSMUSG00000006342	0.14	0.24	0.09	0.48	0.29	0.26	0.156667	0.343333	1.13191	0.0170806	0.0889998	Susd2
ENSMUSG00000044349	0.48	0.39	0.38	0.92	0.62	0.45	0.416667	0.663333	0.67084	0.0171611	0.0892945	Snhg11
ENSMUSG00000030882	0.53	0.16	0.33	0.23	0.09	0.16	0.34	0.16	-1.08746	0.0171957	0.0894255	Dnhd1
ENSMUSG00000097993	1.19	5.86	1.02	0.84	2.11	1.24	2.69	1.39667	-0.945618	0.0172957	0.089771	Ptprv
ENSMUSG00000034227	0.43	0.58	0.31	0.07	0.15	0.26	0.44	0.16	-1.45943	0.0175194	0.0907853	Foxj1
ENSMUSG00000020599	0.36	0.18	0.12	0.55	0.51	0.43	0.22	0.496667	1.17477	0.0181662	0.0934751	Rgs9
ENSMUSG00000047963	0.53	0.74	0.77	0.24	0.29	0.37	0.68	0.3	-1.18057	0.0183032	0.0939976	Stbd1
ENSMUSG00000050272	0.18	0.22	0.15	0.09	0.06	0.11	0.183333	0.0866667	-1.08092	0.0183202	0.0940552	Dscam
ENSMUSG00000039652	0.66	0.54	0.54	0.3	0.25	0.18	0.58	0.243333	-1.25312	0.0186055	0.0953327	Cpeb3
ENSMUSG00000030600	0.44	0.75	0.9	0.34	0.34	0.22	0.696667	0.3	-1.21551	0.0186542	0.0954339	Lrfn1
ENSMUSG00000038967	1.4	1.18	1.27	0.72	0.72	0.8	1.28333	0.746667	-0.78136	0.0188526	0.0961732	Pdk2
ENSMUSG00000053025	0.06	0.06	0.02	0	0	0	0.0466667	0.001	-5.54432	0.0190167	0.0967976	Sv2b
ENSMUSG00000041912	1.7	1.61	0.87	0.78	0.98	0.63	1.39333	0.796667	-0.806492	0.0190287	0.0967976	Tdrkh
ENSMUSG00000070501	0.15	0.14	0.09	0.45	0.21	0.47	0.126667	0.376667	1.57225	0.0190706	0.0969316	Ifi214
ENSMUSG00000042523	0.43	0.42	0.54	1.09	0.97	0.48	0.463333	0.846667	0.869744	0.019113	0.0970702	Dnal1
ENSMUSG00000074682	1.18	1.37	1.63	0.89	0.94	0.79	1.39333	0.873333	-0.673936	0.0193802	0.0979009	Zcchc3
ENSMUSG00000064325	0.01	0.09	0.04	0	0.01	0.01	0.0466667	0.00666667	-2.80735	0.0201027	0.100884	Hhip
ENSMUSG00000038402	0.15	0.15	0.2	0.37	0.63	0.26	0.166667	0.42	1.33342	0.0202151	0.10129	Foxf2
ENSMUSG00000035713	1.42	0.96	1.14	0.85	0.61	0.72	1.17333	0.726667	-0.691247	0.0203416	0.101733	Usp35
ENSMUSG00000013415	0.2	0.18	0.19	0.45	0.22	0.28	0.19	0.316667	0.736966	0.0205784	0.102534	Igf2bp1
ENSMUSG00000022106	36.2	38.58	37.47	93.17	50.73	51.02	37.4167	64.9733	0.796167	0.0206984	0.102897	Rcbtb2
ENSMUSG00000021768	0.32	0.33	0.34	0.55	0.72	0.63	0.33	0.633333	0.940499	0.0207023	0.102897	Dusp13
ENSMUSG00000062012	0.08	0.05	0.02	0.21	0.21	0.24	0.05	0.22	2.1375	0.0207464	0.103052	Zfp13
ENSMUSG00000032766	1.52	1.23	2.02	2.32	2.8	2.89	1.59	2.67	0.747813	0.0210613	0.104264	Gng11
ENSMUSG00000061815	0.97	0.76	1	1.15	1.53	1.71	0.91	1.46333	0.68532	0.0213692	0.105493	Rufy4
ENSMUSG00000046314	0.36	0.38	0.63	0.23	0.23	0.14	0.456667	0.2	-1.19114	0.0216204	0.106536	Stxbp6
ENSMUSG00000030785	0.26	0	0.14	0.64	0.85	0.5	0.133333	0.663333	2.3147	0.021791	0.107245	Cox6a2
ENSMUSG00000074264	0.12	0.03	0.05	0.23	0.27	0.33	0.0666667	0.276667	2.05311	0.021852	0.10748	Amy1
ENSMUSG00000016526	2.57	3.17	2.36	1.86	1.62	1.91	2.7	1.79667	-0.587637	0.0219432	0.107697	Dyrk3
ENSMUSG00000020638	10.24	8.15	9.55	9.19	17.85	16.98	9.31333	14.6733	0.655827	0.021972	0.107806	Cmpk2
ENSMUSG00000024968	2.01	0.67	0.78	0.49	0.25	0.4	1.15333	0.38	-1.60174	0.0220306	0.108027	Rcor2
ENSMUSG00000070323	0.7	0.43	0.35	1.16	1.01	0.78	0.493333	0.983333	0.995118	0.0220876	0.108208	Mmp27
ENSMUSG00000019464	1.3	1.08	1.26	0.67	0.7	1.02	1.21333	0.796667	-0.606928	0.0222474	0.108825	Ptger1
ENSMUSG00000020782	2.13	1.64	1.74	1.3	1.28	1.08	1.83667	1.22	-0.590209	0.0222767	0.108935	Llgl2
ENSMUSG00000022607	3.16	2.96	3.47	1.07	2.92	1.78	3.19667	1.92333	-0.732959	0.022319	0.109108	Ptk2
ENSMUSG00000026768	0.16	0.19	0.22	0.03	0.06	0.14	0.19	0.0766667	-1.30933	0.0224352	0.109609	Itga8
ENSMUSG00000071862	0	0.01	0	0.03	0.04	0.07	0.00333333	0.0466667	3.80735	0.0224777	0.109726	Lrrtm2
ENSMUSG00000003198	5.45	5.71	6.37	3.48	4.19	3.93	5.84333	3.86667	-0.595701	0.0227648	0.110816	Zfp959
ENSMUSG00000063535	0.77	0.53	0.75	0.39	0.43	0.39	0.683333	0.403333	-0.760617	0.0228006	0.110956	Zfp773
ENSMUSG00000060206	0.01	0.01	0.01	0.05	0.04	0.02	0.01	0.0366667	1.87447	0.0228395	0.111091	Zfp462
ENSMUSG00000023885	0.17	0.03	0.03	0.01	0.01	0.01	0.0766667	0.01	-2.9386	0.0229347	0.111339	Thbs2
ENSMUSG00000035211	0.19	0.18	0.14	0.42	0.45	0.35	0.17	0.406667	1.25831	0.0235593	0.113944	Xrra1
ENSMUSG00000021478	0	0	0	0.04	0.05	0.05	0.001	0.0466667	5.54432	0.0237679	0.114759	Drd1
ENSMUSG00000044707	0	0	0	0.08	0.14	0	0.001	0.0733333	6.1964	0.0238239	0.114926	Ccnjl
ENSMUSG00000038065	0.74	0.7	0.66	0.36	0.46	0.39	0.7	0.403333	-0.795382	0.0238365	0.114952	Mturn
ENSMUSG00000037211	1.7	1.52	1.25	0.75	0.67	1.24	1.49	0.886667	-0.748849	0.0239098	0.115219	Spry1
ENSMUSG00000059042	2.31	1.35	1.92	2.3	4.43	2.86	1.86	3.19667	0.781266	0.0239582	0.11539	Klk1b9
ENSMUSG00000030340	1.33	1.62	1.28	0.83	1	0.94	1.41	0.923333	-0.610772	0.0241598	0.116162	Scnn1a
ENSMUSG00000005465	0.62	0.88	0.82	0.47	0.39	0.36	0.773333	0.406667	-0.927244	0.024486	0.117379	Il27ra
ENSMUSG00000079594	1.13	0.76	1.6	0.34	0.17	0.15	1.16333	0.22	-2.40269	0.0245341	0.117463	Cstdc6
ENSMUSG00000022836	0.81	0.81	0.6	0.5	0.47	0.45	0.74	0.473333	-0.644669	0.02454	0.117463	Mylk
ENSMUSG00000063873	0.95	1.12	0.86	2.01	1.42	0.98	0.976667	1.47	0.589878	0.0245976	0.117668	Slc24a3
ENSMUSG00000032547	0.71	0.82	0.55	0.28	0.4	0.36	0.693333	0.346667	-1	0.0246165	0.117724	Ryk
ENSMUSG00000036560	0.53	0.5	0.42	0.14	0.16	0.37	0.483333	0.223333	-1.11382	0.0246898	0.117969	Lgi4
ENSMUSG00000028328	0.04	0	0	0.17	0.12	0.09	0.0133333	0.126667	3.24793	0.0248672	0.118675	Tmod1
ENSMUSG00000030159	1.57	1.12	1.41	3.03	2.39	1.71	1.36667	2.37667	0.798278	0.0250283	0.119373	Clec1b
ENSMUSG00000039699	0.85	0.95	1.3	2.04	1.62	1.46	1.03333	1.70667	0.723876	0.0254064	0.120711	Batf2
ENSMUSG00000089768	0.1	0.11	0.13	1.19	0.59	0.39	0.113333	0.723333	2.67409	0.0258755	0.122298	Tmsb15b1
ENSMUSG00000094796	1.4	2.17	1.5	2.25	2.18	3.39	1.69	2.60667	0.625183	0.0260131	0.122766	BC147527
ENSMUSG00000034336	0.32	0.17	0.33	0.04	0.12	0.12	0.273333	0.0933333	-1.5502	0.0260256	0.122766	Ina
ENSMUSG00000030787	0.36	0.32	0.33	0.15	0.11	0.14	0.336667	0.133333	-1.33628	0.026075	0.122905	Lyve1
ENSMUSG00000014599	36.15	38.04	35.56	82.99	44.75	44.93	36.5833	57.5567	0.653797	0.0261309	0.12305	Csf1
ENSMUSG00000031398	0.31	0.48	0.34	0.17	0.23	0.24	0.376667	0.213333	-0.820179	0.0262326	0.123359	Plxna3
ENSMUSG00000019987	184.68	178.06	179.46	18.05	66.96	102.43	180.733	62.48	-1.5324	0.0262855	0.123499	Arg1
ENSMUSG00000007872	2.15	1.57	1.23	0.95	0.8	0.84	1.65	0.863333	-0.934476	0.0264213	0.123893	Id3
ENSMUSG00000033763	0.23	0.1	0.11	0.02	0.04	0.07	0.146667	0.0433333	-1.75899	0.0268589	0.125641	Mtss2
ENSMUSG00000000791	1.28	1.23	1.21	6.89	1.67	1.79	1.24	3.45	1.47626	0.0271818	0.126856	Il12rb1
ENSMUSG00000093593	0.99	0.83	1.16	0.63	0.57	0.57	0.993333	0.59	-0.751563	0.0271975	0.126893	Gm20683
ENSMUSG00000026170	1.43	1.5	1.61	1.06	0.85	0.78	1.51333	0.896667	-0.755086	0.0273276	0.127315	Cyp27a1
ENSMUSG00000022456	0.21	0.22	0.06	0.01	0	0.03	0.163333	0.0133333	-3.61471	0.0280038	0.129451	Septin3
ENSMUSG00000021066	0.1	0.14	0.13	0.23	0.17	0.21	0.123333	0.203333	0.721284	0.0281597	0.12989	Atl1
ENSMUSG00000024597	0.57	0.53	0.72	0.23	0.46	0.41	0.606667	0.366667	-0.726435	0.0281635	0.12989	Slc12a2
ENSMUSG00000117853	0.26	0.16	0.23	0.18	0.05	0.07	0.216667	0.1	-1.11548	0.0285022	0.131227	Vmn1r88
ENSMUSG00000078816	0.81	0.81	0.74	0.45	0.49	0.33	0.786667	0.423333	-0.893958	0.0285282	0.13127	Prkcg
ENSMUSG00000070604	1.69	1.35	2.86	0.62	0.91	1.44	1.96667	0.99	-0.990252	0.0285393	0.131284	Vsig10l
ENSMUSG00000023032	0.48	0.51	0.61	0.39	0.17	0.26	0.533333	0.273333	-0.964376	0.0288218	0.132301	Slc4a8
ENSMUSG00000030041	0.44	0.74	0.47	1.54	0.99	0.52	0.55	1.01667	0.886343	0.0294588	0.134474	M1ap
ENSMUSG00000020377	3.41	4.79	3.59	8.49	4.4	4.94	3.93	5.94333	0.596743	0.0294686	0.13448	Ltc4s
ENSMUSG00000038094	0.05	0.03	0	0.14	0.13	0.1	0.0266667	0.123333	2.20945	0.0297123	0.135323	Atp13a4
ENSMUSG00000013418	0.08	0.11	0	0.28	0.22	0.3	0.0633333	0.266667	2.074	0.0297318	0.135374	B4galnt2
ENSMUSG00000049230	0	0.29	0.07	0	0	0	0.12	0.001	-6.90689	0.0298004	0.13546	Gm9833
ENSMUSG00000078452	1.89	2.78	2.32	1.82	5.17	4.44	2.33	3.81	0.709461	0.0303254	0.137262	Raet1d
ENSMUSG00000058046	0.51	0.66	0.51	0.88	1.19	0.89	0.56	0.986667	0.817136	0.0303293	0.137262	4933430I17Rik
ENSMUSG00000026674	0.12	0.11	0.1	0.02	0.07	0.02	0.11	0.0366667	-1.58496	0.0304123	0.137536	Ddr2
ENSMUSG00000005611	0.54	0.59	0.36	0.24	0.15	0.4	0.496667	0.263333	-0.915388	0.030862	0.139139	Irag1
ENSMUSG00000027931	0.5	0.29	0.32	0.75	0.62	0.47	0.37	0.613333	0.729146	0.030981	0.139519	Npr1
ENSMUSG00000071470	0.2	0.17	0.32	0.98	0.87	1.02	0.23	0.956667	2.05638	0.0311792	0.140058	Ccnb1ip1
ENSMUSG00000028527	20.68	21.19	24.74	8.91	14.2	13.41	22.2033	12.1733	-0.867052	0.0313865	0.140674	Ak4
ENSMUSG00000013483	0.01	0	0	0.05	0.09	0.02	0.00333333	0.0533333	4	0.0316176	0.141315	Card14
ENSMUSG00000061615	0	0.13	0	0.6	0.23	0.45	0.0433333	0.426667	3.29956	0.0317298	0.141659	H2ac4
ENSMUSG00000033987	0.13	0.13	0.14	0.1	0.03	0.07	0.133333	0.0666667	-1	0.0318944	0.142236	Dnah17
ENSMUSG00000095061	0	0	0	0.17	0.06	0.22	0.001	0.15	7.22882	0.0319629	0.142462	E030018B13Rik
ENSMUSG00000029279	0.08	0.09	0.05	0.19	0.12	0.23	0.0733333	0.18	1.29546	0.0323949	0.144028	Brdt
ENSMUSG00000035095	0.72	0.49	0.54	1.14	0.61	0.89	0.583333	0.88	0.593183	0.0327822	0.145388	Fam167a
ENSMUSG00000038576	0.85	1.31	0.89	0.7	0.56	0.47	1.01667	0.576667	-0.818037	0.0329046	0.14577	Susd4
ENSMUSG00000050357	0.42	0.42	0.39	0.26	0.18	0.19	0.41	0.21	-0.965235	0.0333247	0.147023	Carmil2
ENSMUSG00000032549	0.9	0.68	0.96	0.6	0.39	0.54	0.846667	0.51	-0.731297	0.0333611	0.147062	Rab6b
ENSMUSG00000042734	0.13	0.06	0.1	0.36	0.16	0.24	0.0966667	0.253333	1.38995	0.0340684	0.149278	Ttc9
ENSMUSG00000029410	1.28	1.19	1.19	0.47	1.01	0.79	1.22	0.756667	-0.689151	0.0342212	0.149743	Ppef2
ENSMUSG00000027408	0.11	0.06	0.12	0	0	0.02	0.0966667	0.00666667	-3.85798	0.0345353	0.150912	Cpxm1
ENSMUSG00000060981	0.09	0	0.3	0.29	0.96	1.08	0.13	0.776667	2.57878	0.0346447	0.151308	H4c8
ENSMUSG00000066894	0.78	0.62	0.75	0.37	0.28	0.55	0.716667	0.4	-0.841302	0.0346828	0.151392	Vsig10
ENSMUSG00000029370	0.18	0.74	0.27	1.01	0.41	0.88	0.396667	0.766667	0.950672	0.0347037	0.151437	Rassf6
ENSMUSG00000075015	0	0	0	0.21	0.37	0.3	0.001	0.293333	8.1964	0.0347232	0.151437	Gm10801
ENSMUSG00000032719	0.05	0.04	0.1	0	0	0	0.0633333	0.001	-5.98489	0.0347404	0.151437	Sbspon
ENSMUSG00000052415	0.5	0.56	0.42	0.28	0.28	0.34	0.493333	0.3	-0.7176	0.0347596	0.151439	Tchh
ENSMUSG00000100937	1.37	0.91	1.35	0.51	0.31	0.77	1.21	0.53	-1.19094	0.0352041	0.153043	Nscme3l
ENSMUSG00000070436	1.31	0.02	0.07	0.12	0.1	0.05	0.466667	0.09	-2.3744	0.0357438	0.154678	Serpinh1
ENSMUSG00000016356	0.33	0.32	0.23	0.1	0.17	0.16	0.293333	0.143333	-1.03317	0.0358391	0.154965	Col20a1
ENSMUSG00000032561	25.49	26	26.15	76.51	31.63	32.22	25.88	46.7867	0.85426	0.0359287	0.155269	Acpp
ENSMUSG00000020669	1.4	1.06	1.11	0.52	0.81	0.68	1.19	0.67	-0.828729	0.036057	0.155532	Sh3yl1
ENSMUSG00000040328	0.35	0.37	0.22	0.55	0.52	0.8	0.313333	0.623333	0.992306	0.0360998	0.155548	Olfr56
ENSMUSG00000028339	0.56	1.04	0.69	1.48	1.35	0.87	0.763333	1.23333	0.692178	0.0362348	0.15592	Col15a1
ENSMUSG00000105053	0.05	0.08	0.28	0.5	0.3	0.21	0.136667	0.336667	1.30066	0.0363754	0.1564	Gm43064
ENSMUSG00000026458	0.71	0.9	0.77	0.62	0.51	0.35	0.793333	0.493333	-0.685364	0.0370487	0.158573	Ppfia4
ENSMUSG00000046523	0	0	0	0.03	0.05	0.03	0.001	0.0366667	5.1964	0.0372608	0.159226	Kctd4
ENSMUSG00000008193	1.08	0.93	0.55	0.52	0.32	0.45	0.853333	0.43	-0.988773	0.0375039	0.159882	Spib
ENSMUSG00000036564	0.42	0.43	0.57	0.82	0.66	0.95	0.473333	0.81	0.775065	0.0377919	0.160768	Ndrg4
ENSMUSG00000054594	0	0.05	0	0.12	0.29	0.06	0.0166667	0.156667	3.23266	0.0378323	0.160898	Oscar
ENSMUSG00000014543	0.55	0.83	0.84	1.29	1.25	1.38	0.74	1.30667	0.820294	0.0380742	0.161755	Klra17
ENSMUSG00000062275	0.23	0.13	0.35	0	0.09	0.04	0.236667	0.0433333	-2.44931	0.038184	0.16206	Fbxw24
ENSMUSG00000072647	0.75	0.71	0.55	0.33	0.24	0.54	0.67	0.37	-0.856636	0.0381864	0.16206	Adam1a
ENSMUSG00000053559	1.46	1.29	1.36	0.53	0.7	0.89	1.37	0.706667	-0.955074	0.0383384	0.162405	Smagp
ENSMUSG00000050675	1.35	1.18	1.16	0.63	0.85	0.85	1.23	0.776667	-0.663291	0.0383636	0.162426	Gp1ba
ENSMUSG00000054580	0	0.01	0	0.04	0.05	0	0.00333333	0.03	3.16993	0.0384472	0.162694	Pla2r1
ENSMUSG00000076749	0.76	0.58	0.72	1.98	0.7	1.47	0.686667	1.38333	1.01047	0.0393261	0.165454	Trgc1
ENSMUSG00000057346	0	0	0.06	0.21	0.14	0.17	0.02	0.173333	3.11548	0.0396017	0.166483	Apol9a
ENSMUSG00000032315	0	0	0	0.25	0	0	0.001	0.0833333	6.38082	0.0402832	0.168817	Cyp1a1
ENSMUSG00000036928	1.06	0.76	1.12	0.59	0.4	0.42	0.98	0.47	-1.06012	0.0403349	0.168946	Stag3
ENSMUSG00000022651	25.63	20.9	28.72	5.51	15.82	15.62	25.0833	12.3167	-1.02612	0.0405415	0.169546	Retnlg
ENSMUSG00000090210	0.35	0.26	0.27	0.15	0.18	0.13	0.293333	0.153333	-0.93587	0.041297	0.171811	Itga10
ENSMUSG00000023232	0.19	0.18	0.05	0.46	0.42	0.24	0.14	0.373333	1.41504	0.0413772	0.172083	Serinc2
ENSMUSG00000078154	0.3	0.14	0	0	0	0	0.146667	0.001	-7.1964	0.0414785	0.172431	Gm12184
ENSMUSG00000026874	0.22	0.13	0.13	0	0.01	0	0.16	0.00333333	-5.58496	0.0415365	0.172628	Hc
ENSMUSG00000037762	0.06	0.03	0	0.24	0.07	0.06	0.03	0.123333	2.03953	0.0417197	0.173196	Slc16a9
ENSMUSG00000003849	4.86	4.13	4.72	22.02	5.13	6.33	4.57	11.16	1.28807	0.0418253	0.17338	Nqo1
ENSMUSG00000004113	1.36	1.37	1.32	0.6	0.79	1.05	1.35	0.813333	-0.731041	0.0419119	0.173541	Cacna1b
ENSMUSG00000017491	0.1	0.12	0.12	0	0	0.05	0.113333	0.0166667	-2.76553	0.0422988	0.174711	Rarb
ENSMUSG00000039814	1.32	1.28	1.37	0.98	0.86	0.8	1.32333	0.88	-0.588601	0.0426291	0.175849	Xkr5
ENSMUSG00000021390	0.37	0.02	0.06	0.02	0.03	0.02	0.15	0.0233333	-2.6845	0.0437974	0.179883	Ogn
ENSMUSG00000021338	0.59	0.76	0.28	0.43	1.51	0.77	0.543333	0.903333	0.733421	0.0440789	0.180863	Carmil1
ENSMUSG00000024697	0	0.04	0.03	0.09	0.1	0.03	0.0233333	0.0733333	1.65208	0.0442654	0.181387	Gna14
ENSMUSG00000078902	0.1	0.08	0.08	0.03	0.01	0.01	0.0866667	0.0166667	-2.37851	0.0453311	0.184718	Gm14443
ENSMUSG00000052013	3.96	3.27	3.47	9.22	4.22	3.99	3.56667	5.81	0.703962	0.0461881	0.187071	Btla
ENSMUSG00000079164	0.5	0.63	0.59	0.22	0.28	0.46	0.573333	0.32	-0.841302	0.0462196	0.187128	Tlr5
ENSMUSG00000054280	13.55	8.13	18.2	7.01	7.63	6.57	13.2933	7.07	-0.910921	0.0462413	0.187131	Prr14l
ENSMUSG00000027221	0.93	0.91	1.15	0.54	0.46	0.8	0.996667	0.6	-0.732149	0.0462997	0.187192	Chst1
ENSMUSG00000001435	0.51	0.32	0.22	0.16	0.3	0.11	0.35	0.19	-0.881356	0.0463659	0.187318	Col18a1
ENSMUSG00000111692	0.06	0.06	0.13	0	0	0	0.0833333	0.001	-6.38082	0.0463801	0.187328	Gm49373
ENSMUSG00000024074	0.5	0.33	0.47	0.19	0.17	0.31	0.433333	0.223333	-0.956279	0.0465171	0.187693	Crim1
ENSMUSG00000003585	0.08	0.06	0.14	0.28	0.32	0.15	0.0933333	0.25	1.42146	0.0470372	0.189402	Sec14l2
ENSMUSG00000018925	0.14	0.05	0.1	0.37	0.27	0.21	0.0966667	0.283333	1.55141	0.0475002	0.190892	Heatr9
ENSMUSG00000032827	0.51	0.38	0.37	0.91	0.46	0.61	0.42	0.66	0.652077	0.0477038	0.191519	Ppp1r9a
ENSMUSG00000024673	0.09	0.11	0.06	0.21	0.29	0.15	0.0866667	0.216667	1.32193	0.0483201	0.193654	Ms4a1
ENSMUSG00000039063	0.26	0.16	0.28	0.73	0.28	0.52	0.233333	0.51	1.1281	0.0483517	0.193732	Echdc3
ENSMUSG00000021913	0.16	0.13	0.17	0.03	0.06	0.08	0.153333	0.0566667	-1.4361	0.0484701	0.19411	Ogdhl
ENSMUSG00000032198	0.48	0.82	0.74	0.36	0.55	0.34	0.68	0.416667	-0.706641	0.0485682	0.194406	Dock6
ENSMUSG00000032908	0	0	0.01	0.04	0.05	0.04	0.00333333	0.0433333	3.70044	0.0486072	0.194504	Sgpp2
ENSMUSG00000051811	0.09	0.22	0	1.09	0.27	0.31	0.103333	0.556667	2.42951	0.0488402	0.195203	Cox6b2
ENSMUSG00000022756	0.14	0.32	0.26	0.55	0.44	0.5	0.24	0.496667	1.04924	0.0488888	0.195225	Slc7a4
ENSMUSG00000002985	20.05	18.13	22.34	4.15	13.66	11.68	20.1733	9.83	-1.03719	0.0488944	0.195225	Apoe
ENSMUSG00000004328	0.08	0.1	0.07	0.02	0.02	0.01	0.0833333	0.0166667	-2.32193	0.0491086	0.195837	Hif3a
